# Supplementary material for: Unveiling n → π* interactions: convergence of quantum crystallography and computational insights
Source: Royal Society of Chemistry journal article supplement (doi:10.1039/d5dt02386f), 2026-01-01
Supplement: d5dt02386f1.pdf [file d5dt02386f1.pdf]

## Supplementary Information

### Unveiling $n \rightarrow \pi^*$ Interactions: Convergence of Quantum Crystallography and Computational Insights

Alvaro Polo, Pilar García-Orduña, Jorge Echeverría, and Pablo J. Sanz Miguel\*

Departamento de Química Inorgánica, Instituto de Síntesis Química y Catálisis Homogénea (ISQCH),  
Universidad de Zaragoza-CSIC, 50009 Zaragoza, Spain

#### Table of contents

|                                                         |    |
|---------------------------------------------------------|----|
| 1. General methods and materials.....                   | 2  |
| 2. Experimental section and spectroscopic details.....  | 2  |
| 3. NMR spectra .....                                    | 6  |
| 4. Crystal structure determination.....                 | 22 |
| 5. Hydrogen Bonding .....                               | 24 |
| 6. Computational details .....                          | 25 |
| 7. Hirshfeld surface and fingerprint plot analysis..... | 26 |
| 8. Quantum crystallography.....                         | 26 |
| 9. References .....                                     | 31 |

## 1. General methods and materials

All the reagents used in this work were purchased from commercial sources and used as received. Glassware was dried at 120 °C before use. Unless otherwise stated, all reactions were carried out under aerobic conditions. Organic solvents were dried by standard procedures and distilled under argon prior to use, or obtained oxygen- and waterfree from a Solvent Purification System (Innovative Technologies).  $^1\text{H}$  and  $^{13}\text{C}\{^1\text{H}\}$  NMR spectra were recorded on Bruker Avance 300 (300.13 and 75.48 MHz, respectively) and Bruker Avance 400 (400.16 and 100.61 MHz, respectively) spectrometers. Spectral assignments were achieved by combination of  $^1\text{H}$ - $^1\text{H}$  COSY,  $^{13}\text{C}\{^1\text{H}\}$ -APT and  $^1\text{H}$ - $^{13}\text{C}$  HSQC/HMBC. NMR chemical shifts (expressed in parts per million) are referenced to residual solvent peaks ( $^1\text{H}$  and  $^{13}\text{C}$ ). Methanol was used as internal standard in  $^{13}\text{C}\{^1\text{H}\}$  and  $^1\text{H}$ - $^{13}\text{C}$  HSQC/HMBC spectra carried out in  $\text{D}_2\text{O}$ . Coupling constants,  $J$ , are given in hertz (Hz). High-resolution electrospray mass spectra (HRMS) were acquired using a MicroTOF-Q hybrid quadrupole time-of-flight spectrometer (Bruker Daltonics, Bremen, Germany).

## 2. Experimental section and spectroscopic details

**Synthesis of 1[NO<sub>3</sub>]:** 1[NO<sub>3</sub>] was synthesized with slight modifications of a previously published method.<sup>SI-1</sup> Caffeine (8.00 g, 41.2 mmol) was added to an aqueous solution (100 mL) of sodium hydroxide (5.06 g, 126 mmol) and stirred for 24 hours. The white precipitate gradually disappeared, leading to a colorless solution. At 0 °C, nitric acid (15 mL, 237 mmol) was added dropwise and the mixture stirred for 30 minutes. The white precipitate was filtered, washed with small portions of water and cold methanol and dried under vacuum to yield 3.30 g (14.3 mmol, 35%) of 1[NO<sub>3</sub>].  $^1\text{H}$  NMR (400 MHz, DMSO- $d_6$ , 298 K):  $\delta$  8.72 (s, 1H, C8-H), 7.60 (d,  $^3J_{\text{H-H}} = 4.5$  Hz, 1H, N1-H), 3.87 (s, 3H, N7-CH<sub>3</sub>), 2.83 (s, 3H, N3-CH<sub>3</sub>), 2.73 (d,  $^3J_{\text{H-H}} = 4.5$  Hz, 3H, N1-CH<sub>3</sub>).  $^{13}\text{C}\{^1\text{H}\}$  NMR (100 MHz, DMSO- $d_6$ , 298 K):  $\delta$  159.4 (C6), 143.8 (C4), 131.6 (C8), 105.0 (C5), 36.0 (N7-C), 30.3 (N3-C), 26.0 (N1-C). HRMS (DMSO/MeOH)  $[\text{M} - \text{NO}_3 - \text{H} + \text{Na}]^+$  calcd. for  $\text{C}_7\text{H}_{12}\text{N}_4\text{ONa}$ : 191.0903; Found: 191.0906.

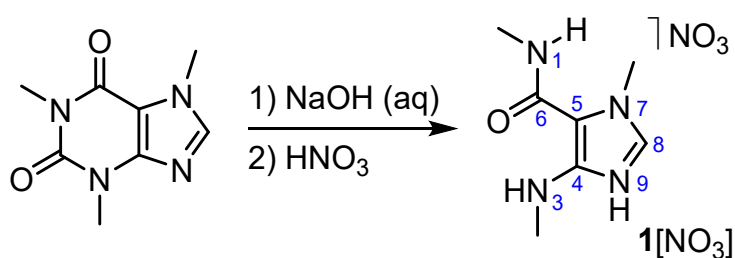

Figure SI-1. Synthesis of 1[NO<sub>3</sub>].

**Synthesis of 2[NO<sub>3</sub>]:** 2[NO<sub>3</sub>] was synthesized with slight modifications of a previously published procedure.<sup>SI-2</sup> A suspension of 1[NO<sub>3</sub>] (2.70 g, 11.7 mmol) in 15 mL of triethyl orthoformate was stirred at 110 °C for 90 minutes. Once the mixture cooled down to room temperature, acetone (10 mL) was added and the white solid was filtered off, washed with small portions of acetone and dried under vacuum to yield 1.96 g (8.14 mmol, 70%) of 2[NO<sub>3</sub>]. Crystals suitable for X-ray diffraction analysis were grown by slow diffusion of diethyl ether into a solution of 2[NO<sub>3</sub>] in acetonitrile at 4 °C.  $^1\text{H}$  NMR (400 MHz, DMSO- $d_6$ , 298 K):  $\delta$  9.82 (s, 1H, C2-H), 8.57 (s, 1H, C8-H), 4.05 (s, 3H, N7-CH<sub>3</sub>), 3.98 (s, 3H, N3-CH<sub>3</sub>), 3.64 (s, 3H, N1-CH<sub>3</sub>).  $^{13}\text{C}\{^1\text{H}\}$  NMR (100 MHz, DMSO- $d_6$ ,

298 K):  $\delta$  151.5 (C6), 151.3 (C2), 147.2 (C8), 146.2 (C4, C8), 114.4 (C5), 37.3 (N3-C), 35.6 (N1-C), 33.8 (N7-C). HRMS (MeOH)  $[M - NO_3]^+$  calcd. for  $C_8H_{11}N_4O$ : 179.0927; Found: 179.0936.

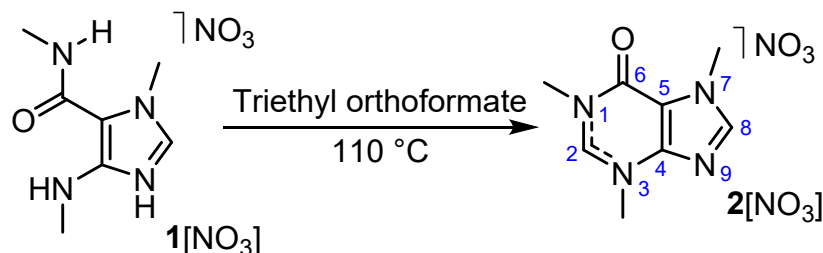

Figure SI-2. Synthesis of **2**[NO<sub>3</sub>].

**Synthesis of **1**[Cl]:** **1**[NO<sub>3</sub>] (2.42 g, 10.5 mmol) was added to an aqueous solution (12 mL) of potassium carbonate (3.62 g, 26.2 mmol) and the mixture stirred for 30 minutes. The grey oil which separated was extracted three times into chloroform (3 × 10 mL). The organic phases were combined, washed with magnesium sulfate and evaporated to dryness, obtaining a dense yellow oil. Shortly after, the oil was dissolved in 8 mL of acetone and 1.6 mL (19 mmol) of hydrochloric acid (37%) were added, giving rise to a white precipitate, which was filtered, washed with small portions of acetone and dried under vacuum to yield 1.26 g of **1**[Cl] (6.16 mmol, 59%). Crystals suitable for X-ray diffraction analysis were grown by slow diffusion of diethyl ether into a solution of **1**[Cl] in methanol at 4 °C. <sup>1</sup>H NMR (400 MHz, CD<sub>3</sub>OD, 298 K):  $\delta$  8.58 (s, 1H, C8-H), 3.99 (s, 3H, N7-CH<sub>3</sub>), 2.97 (s, 3H, N3-CH<sub>3</sub>), 2.87 (s, 3H, N1-CH<sub>3</sub>). <sup>13</sup>C{<sup>1</sup>H} NMR (100 MHz, CD<sub>3</sub>OD, 298 K):  $\delta$  161.6 (C6), 145.3 (C4), 133.3 (C8), 106. (C5), 36.9 (N7-C), 30.8 (N3-C), 26.4 (N1-C). HRMS (MeOH)  $[M - Cl]^+$  calcd. for  $C_7H_{13}N_4O$ : 169.1084; Found: 169.1090.

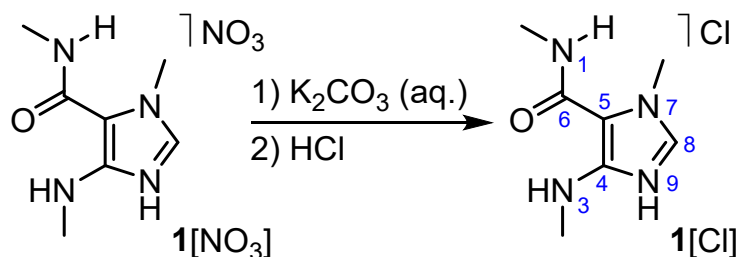

Figure SI-3. Synthesis of **1**[Cl].

**Synthesis of **2**[Cl]:** **1**[Cl] (993 mg, 4.85 mmol) was suspended in triethyl orthoformate (7 mL) and the mixture heated at 110 °C for 2 hours. After cooling down to room temperature, 5 mL of acetone were added and the white precipitate was filtered, washed with small portions of acetone and dried under vacuum to yield 996 mg (4.64 mmol, 96%) of **2**[Cl]. Crystals suitable for X-ray diffraction analysis were grown by slow evaporation of a saturated solution of **2**[Cl] in water at room temperature. <sup>1</sup>H NMR (400 MHz, CD<sub>3</sub>OD, 298 K):  $\delta$  9.69 (s, 1H, C2-H), 8.37 (s, 1H, C8-H), 4.15 (s, 3H, N7-CH<sub>3</sub>), 4.11 (s, 3H, N3-CH<sub>3</sub>), 3.78 (s, 3H, N1-CH<sub>3</sub>). <sup>13</sup>C{<sup>1</sup>H} NMR (100 MHz, CD<sub>3</sub>OD, 298 K):  $\delta$  152.9 (C6), 151.9 (t, <sup>1</sup>J<sub>C-D</sub> = 32.5 Hz, C2), 147.8 (C4), 147.3 (C8), 116.4 (C5), 38.2 (N3-C), 36.8 (N1-C), 34.5 (N7-C). HRMS (MeOH)  $[M - Cl]^+$  calcd. for  $C_8H_{11}N_4O$ : 179.0927; Found: 179.0936.

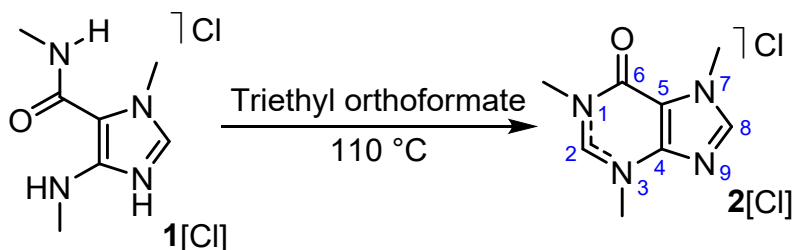

Figure SI-4. Synthesis of **2[Cl]**.

**Synthesis of **2[PF<sub>6</sub>]**:** **2[PF<sub>6</sub>]** was synthesized with slight modifications of a previously published procedure.<sup>SI-2</sup> Ammonium hexafluorophosphate (435 mg, 2.67 mmol) was added to a solution of **2[NO<sub>3</sub>]** (615 mg, 2.55 mmol) in water (10 mL). After vigorous stirring for 15 minutes, the white precipitate was filtered off, washed with small portions of water and cold methanol and dried under vacuum to yield 658 mg (2.03 mmol, 80%) of **2[PF<sub>6</sub>]**. <sup>1</sup>H NMR (400 MHz, CD<sub>3</sub>CN, 298 K): δ 8.94 (s, 1H, C2-H), 8.12 (s, 1H, C8-H), 4.05 (s, 3H, N7-CH<sub>3</sub>), 4.00 (s, 3H, N3-CH<sub>3</sub>), 3.67 (s, 3H, N1-CH<sub>3</sub>). <sup>13</sup>C{<sup>1</sup>H} NMR (100 MHz, CD<sub>3</sub>CN, 298 K): δ 152.5 (C6), 150.9 (C2), 147.5 (C4), 147.0 (C8), 116.3 (C5), 38.5 (N3-C), 36.6 (N1-C), 34.8 (N7-C). HRMS (CH<sub>3</sub>CN) [M – PF<sub>6</sub>]<sup>+</sup> calcd. for C<sub>8</sub>H<sub>11</sub>N<sub>4</sub>O: 179.0927; Found: 179.0927.

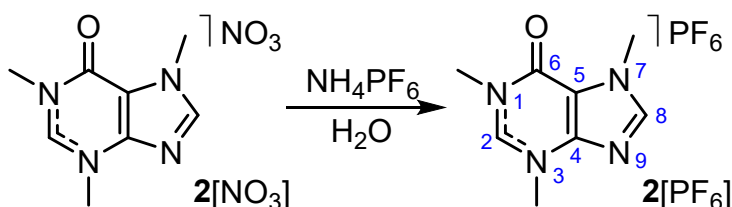

Figure SI-5. Synthesis of **2[PF<sub>6</sub>]**.

**Synthesis of **2[Br]**:** lithium bromide (374 mg, 4.31 mmol) was added to a solution of **2[PF<sub>6</sub>]** (528 mg, 1.63 mmol) in acetonitrile (5 mL). After vigorous stirring for 10 minutes, the white precipitate was filtered off, washed with small portions of diethyl ether and acetone and dried under vacuum to yield 341 mg (1.32 mmol, 81%) of **2[Br]**. Crystals suitable for X-ray diffraction analysis were grown by slow evaporation of a saturated solution of **2[Br]** in water at room temperature. <sup>1</sup>H NMR (400 MHz, DMSO-*d*<sub>6</sub>, 298 K): δ 10.03 (s, 1H, C2-H), 8.60 (s, 1H, C8-H), 4.05 (s, 3H, N7-CH<sub>3</sub>), 3.98 (s, 3H, N3-CH<sub>3</sub>), 3.64 (s, 3H, N1-CH<sub>3</sub>). <sup>13</sup>C{<sup>1</sup>H} NMR (100 MHz, DMSO-*d*<sub>6</sub>, 298 K): δ 151.6 (C6), 151.0 (C2), 146.2 (C8, C4), 114.4 (C5), 37.2 (N3-C), 35.4 (N1-C), 33.8 (N7-C). HRMS (MeOH) [M – Br]<sup>+</sup> calcd. for C<sub>8</sub>H<sub>11</sub>N<sub>4</sub>O: 179.0927; Found: 179.0934.

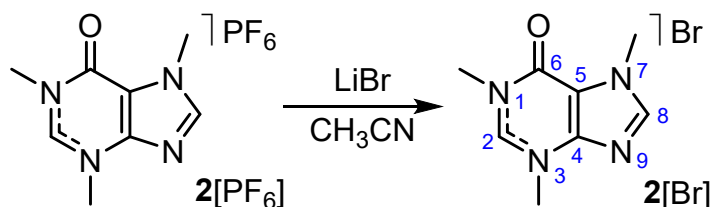

Figure SI-6. Synthesis of **2[Br]**.

**Synthesis of **2[I]**:** sodium iodide (930 mg, 6.20 mmol) was added to a solution of **2[PF<sub>6</sub>]** (798 mg, 2.46 mmol) in acetonitrile (6 mL). After vigorous stirring for 20 minutes, the yellow precipitate was filtered off, washed with small portions of diethyl ether and acetone and dried under vacuum to yield 641 mg (2.09 mmol, 85%) of **2[I]**. Crystals suitable for X-ray diffraction analysis

were grown by slow evaporation of a saturated solution of **2**[I] in water at room temperature.  $^1\text{H}$  NMR (400 MHz, DMSO- $d_6$ , 298 K):  $\delta$  9.85 (s, 1H, C2-H), 8.58 (s, 1H, C8-H), 4.05 (s, 3H, N7-CH<sub>3</sub>), 3.97 (s, 3H, N3-CH<sub>3</sub>), 3.63 (s, 3H, N1-CH<sub>3</sub>).  $^{13}\text{C}\{^1\text{H}\}$  NMR (100 MHz, DMSO- $d_6$ , 298 K):  $\delta$  151.5 (C6), 151.0 (C2), 146.1 (C8, C4), 114.4 (C5), 37.3 (N3-C), 35.5 (N1-C), 33.8 (N7-C). HRMS (MeOH)  $[\text{M} - \text{I}]^+$  calcd. for C<sub>8</sub>H<sub>11</sub>N<sub>4</sub>O: 179.0927; Found: 179.0931.

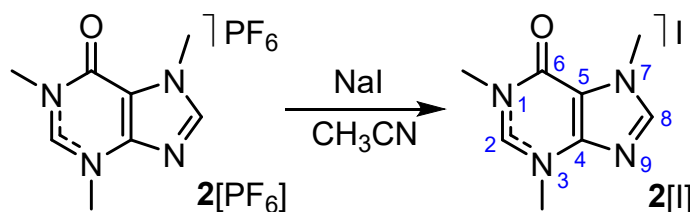

Figure SI-7. Synthesis of **2**[I].

**Synthesis of 3[Cl]:** **1**[Cl] (842 mg, 4.11 mmol) was suspended in triethyl orthoacetate (4 mL) and the mixture heated at 110 °C for 2 hours. After cooling down to room temperature, 10 mL of acetone were added and the white precipitate was filtered, washed with small portions of acetone and dried under vacuum to yield 738 mg (3.23 mmol, 57%) of **3**[Cl]. Crystals suitable for X-ray diffraction analysis were grown by slow evaporation of a saturated solution of **3**[Cl] in water at room temperature.  $^1\text{H}$  NMR (400 MHz, D<sub>2</sub>O, 298 K):  $\delta$  8.29 (s, 1H, C8-H), 4.16 (s, 1H, N3-CH<sub>3</sub>), 4.11 (s, 3H, N7-CH<sub>3</sub>), 3.81 (s, 3H, N1-CH<sub>3</sub>), 3.02 (s, 3H, C2-CH<sub>3</sub>).  $^{13}\text{C}\{^1\text{H}\}$  NMR (100 MHz, D<sub>2</sub>O, 298 K):  $\delta$  161.7 (C2), 153.2 (C6), 147.4 (C4), 146.7 (C8), 114.8 (C5), 37.1 (N3-C), 34.6 (N7-C), 33.7 (N1-C), 19.4 (C2-C). HRMS (MeOH)  $[\text{M} - \text{Cl}]^+$  calcd. for C<sub>9</sub>H<sub>13</sub>N<sub>4</sub>O: 193.1084; Found: 193.1092.

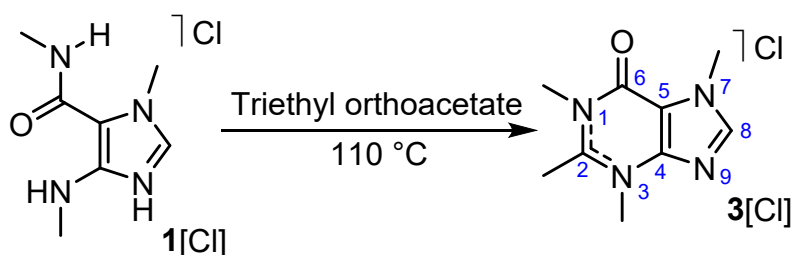

Figure SI-8. Synthesis of **3**[Cl].

### 3. NMR spectra

#### NMR spectra of **1**[NO<sub>3</sub>]

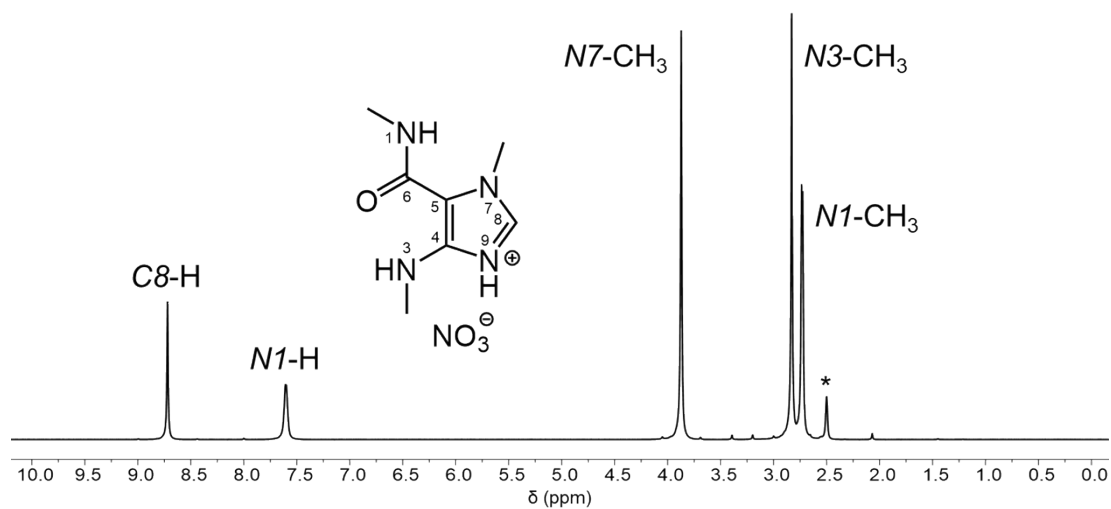

Figure SI-9. <sup>1</sup>H NMR spectrum of **1**[NO<sub>3</sub>] in DMSO-*d*<sub>6</sub> at 298 K.

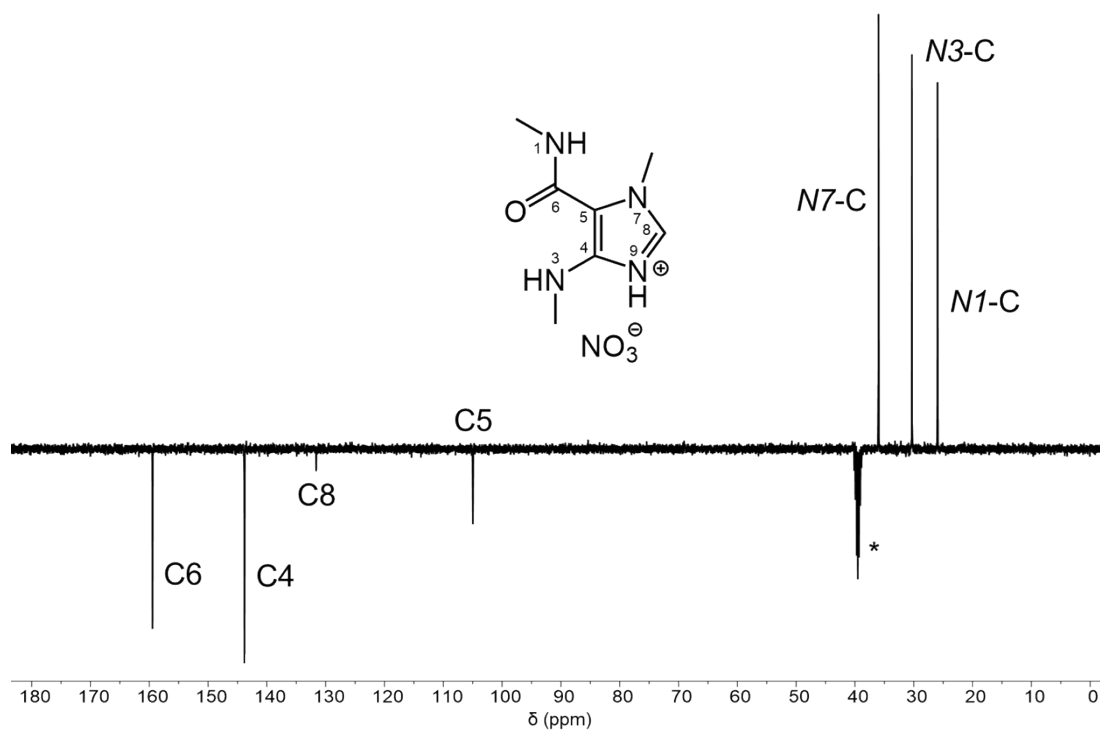

Figure SI-10. <sup>13</sup>C{<sup>1</sup>H}-APT NMR spectrum of **1**[NO<sub>3</sub>] in DMSO-*d*<sub>6</sub> at 298 K.

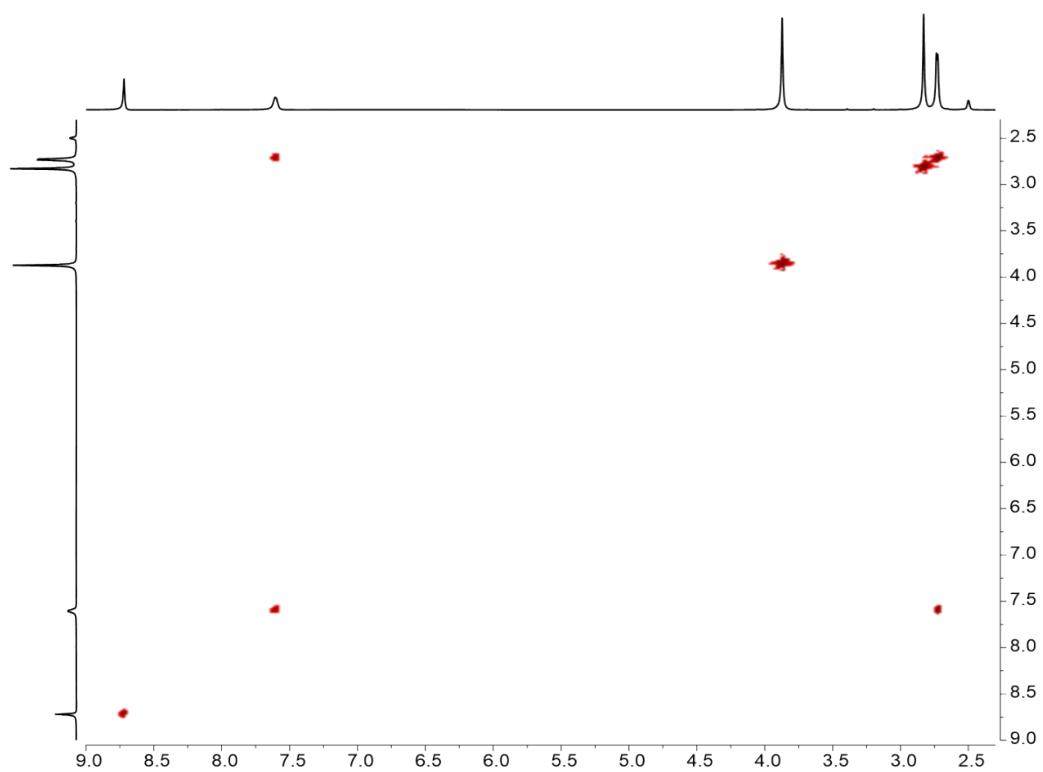

Figure SI-11.  $^1\text{H}$ - $^1\text{H}$  COSY NMR spectrum of **1**[ $\text{NO}_3$ ] in  $\text{DMSO}-d_6$  at 298 K.

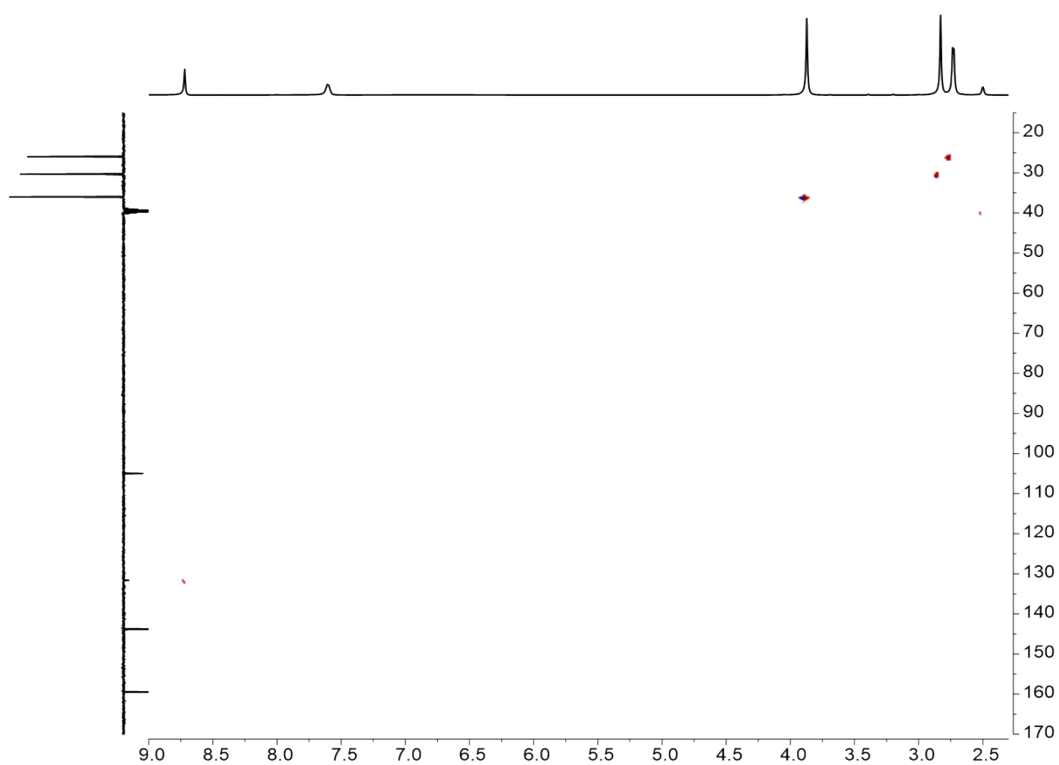

Figure SI-12.  $^1\text{H}$ - $^{13}\text{C}$  HSQC NMR spectrum of **1**[ $\text{NO}_3$ ] in  $\text{DMSO}-d_6$  at 298 K.

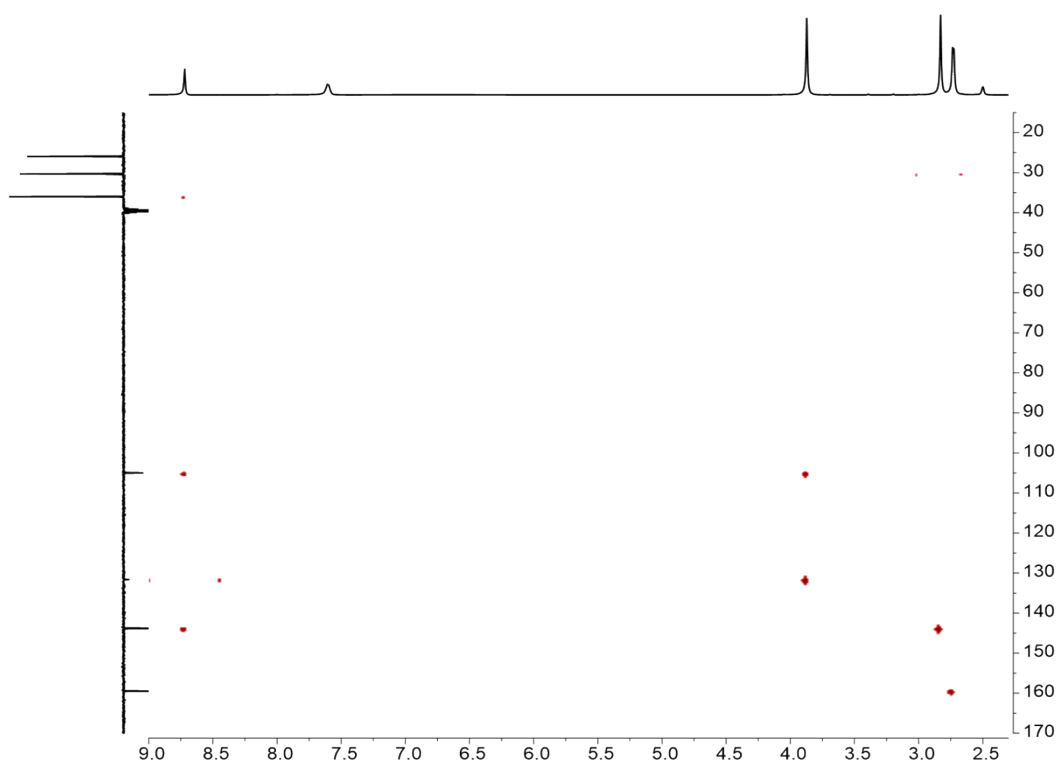

Figure SI-13.  $^1\text{H}$ - $^{13}\text{C}$  HMBC NMR spectrum of **1**[ $\text{NO}_3$ ] in  $\text{DMSO}-d_6$  at 298 K.

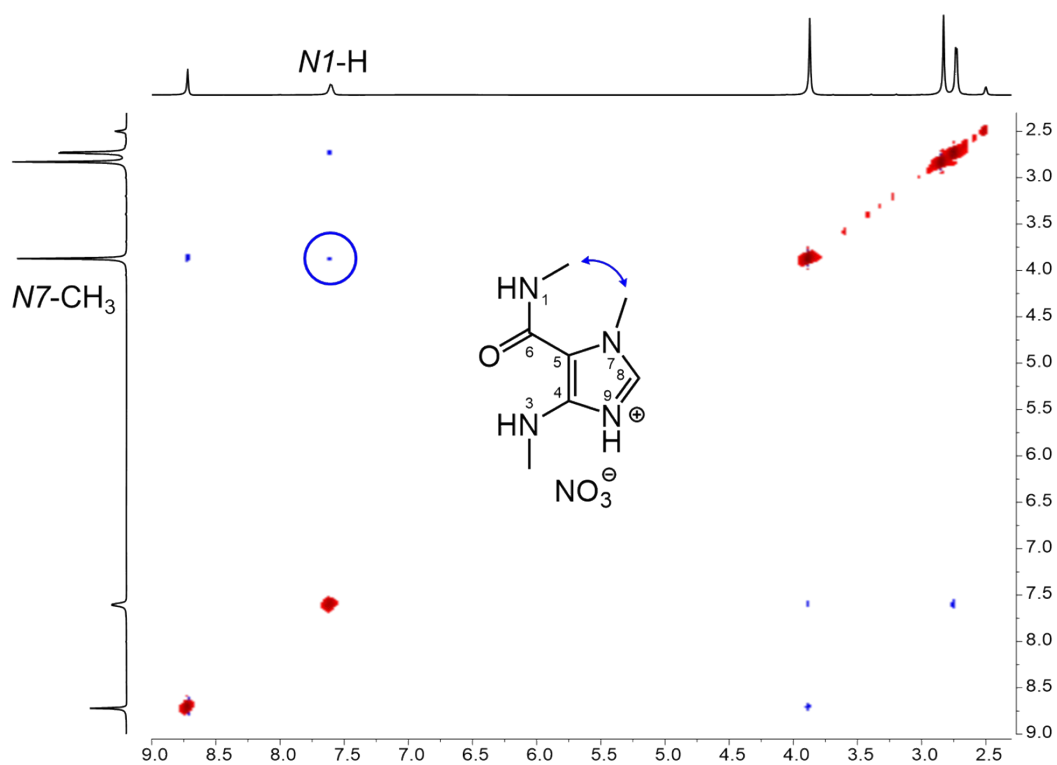

Figure SI-14.  $^1\text{H}$ - $^1\text{H}$  2D-NOESY NMR spectrum of **1**[ $\text{NO}_3$ ] in  $\text{DMSO}-d_6$  at 298 K.



# NMR spectra of **2**[NO<sub>3</sub>]

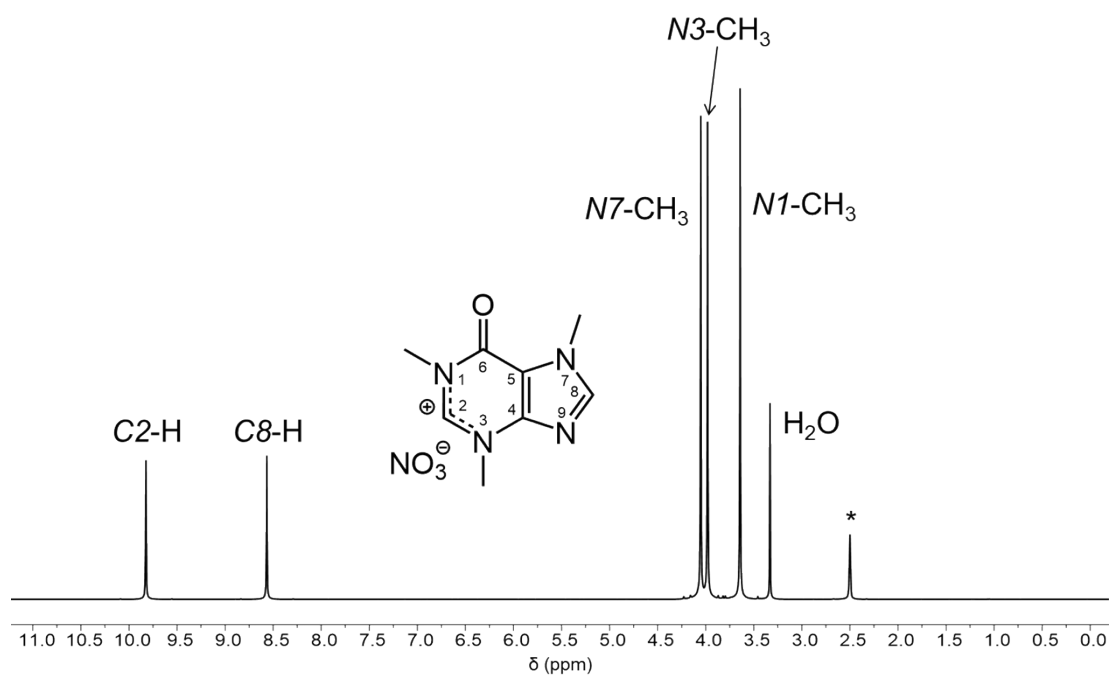

Figure SI-15. <sup>1</sup>H NMR spectrum of **2**[NO<sub>3</sub>] in DMSO-*d*<sub>6</sub> at 298 K.

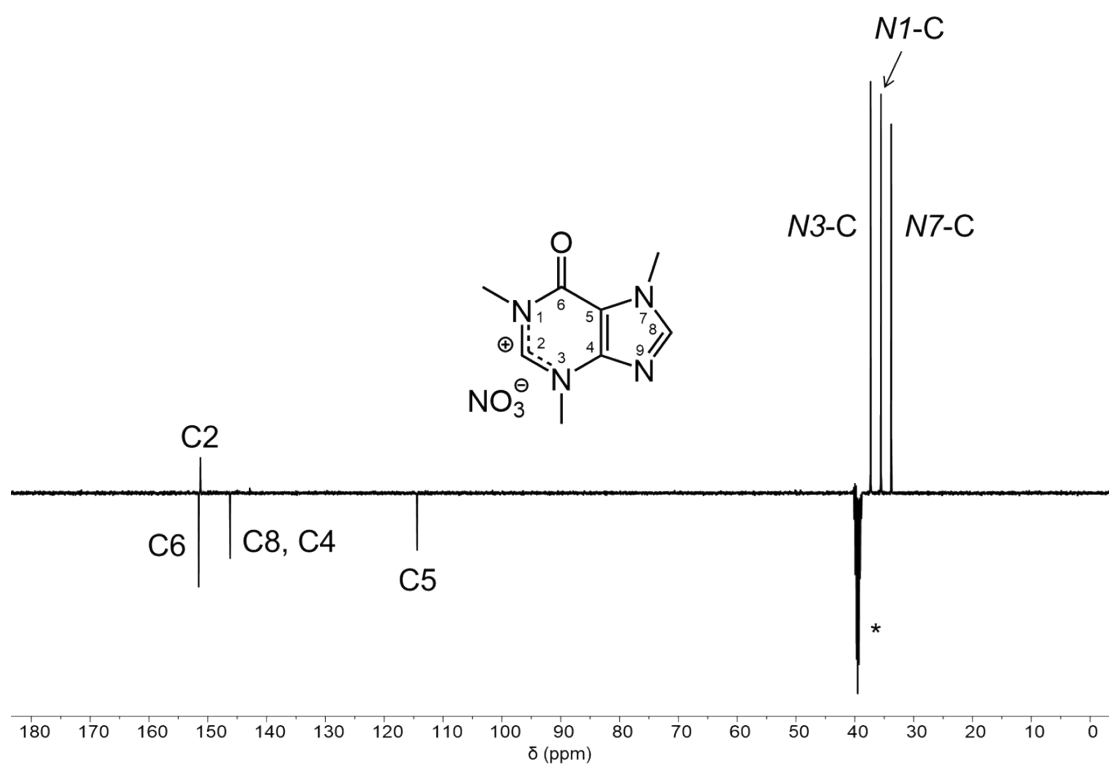

Figure SI-16. <sup>13</sup>C{<sup>1</sup>H}-APT NMR spectrum of **2**[NO<sub>3</sub>] in DMSO-*d*<sub>6</sub> at 298 K.

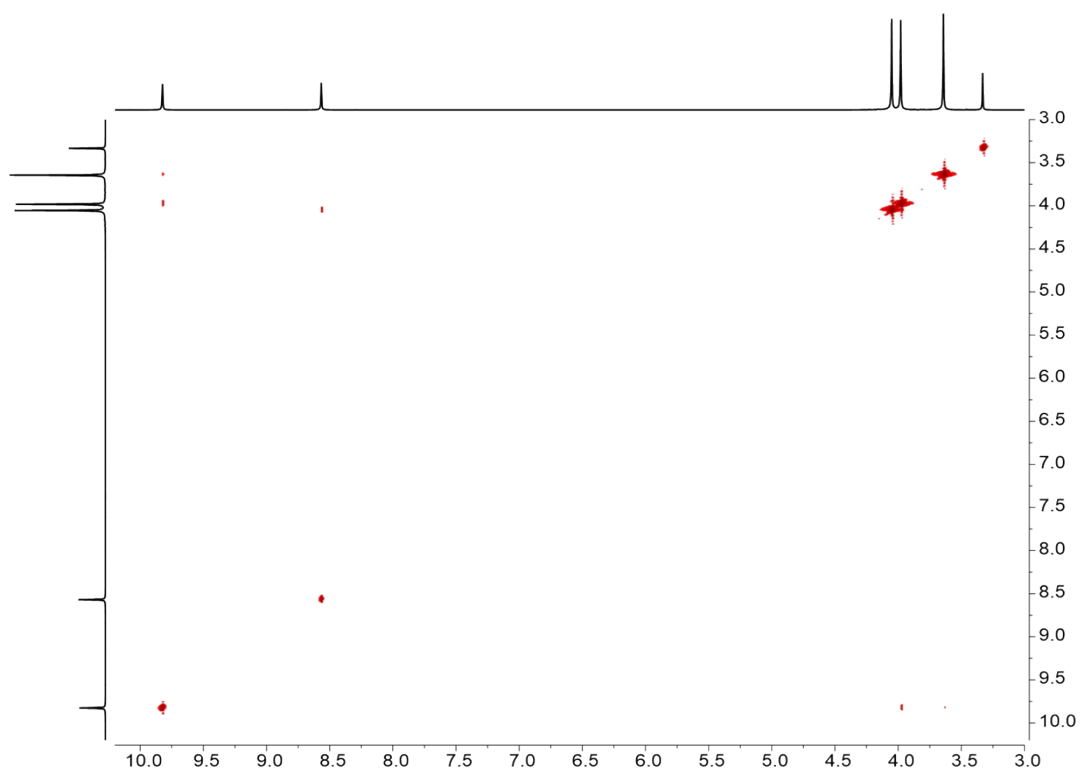

Figure SI-17.  $^1\text{H}$ - $^1\text{H}$  COSY NMR spectrum of **2**[ $\text{NO}_3$ ] in  $\text{DMSO-}d_6$  at 298 K.

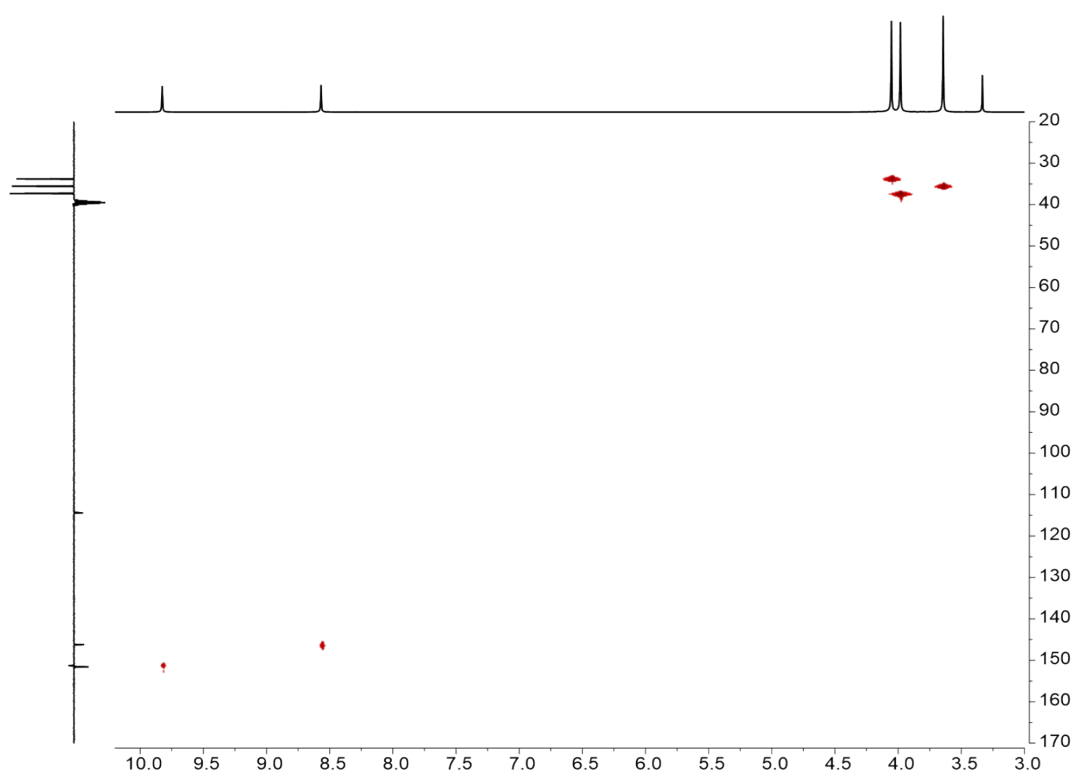

Figure SI-18.  $^1\text{H}$ - $^{13}\text{C}$  HSQC NMR spectrum of **2**[ $\text{NO}_3$ ] in  $\text{DMSO-}d_6$  at 298 K.

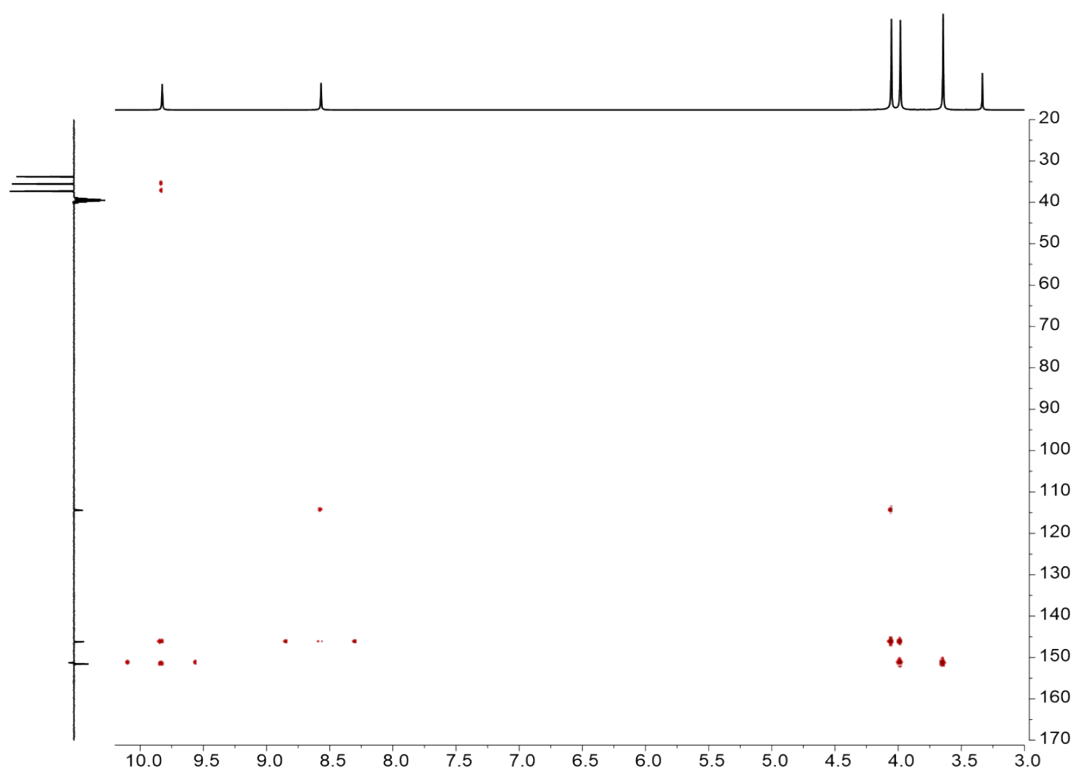

Figure SI-19.  $^1\text{H}$ - $^{13}\text{C}$  HMBC NMR spectrum of **2**[ $\text{NO}_3$ ] in  $\text{DMSO}-d_6$  at 298 K.

### NMR spectra of **1**[Cl]

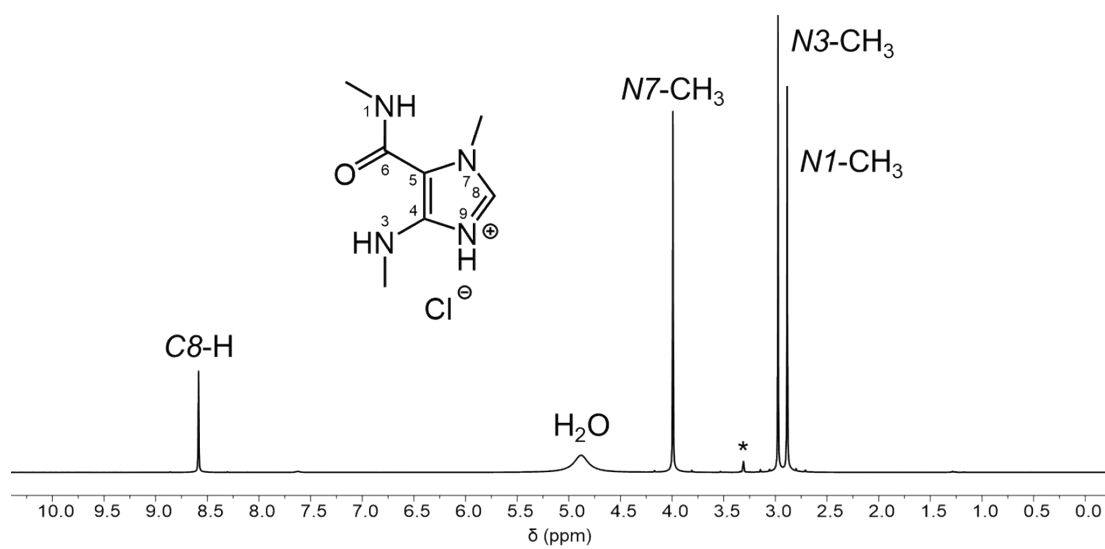

Figure SI-20.  $^1\text{H}$  NMR spectrum of **1**[Cl] in  $\text{CD}_3\text{OD}$  at 298 K.

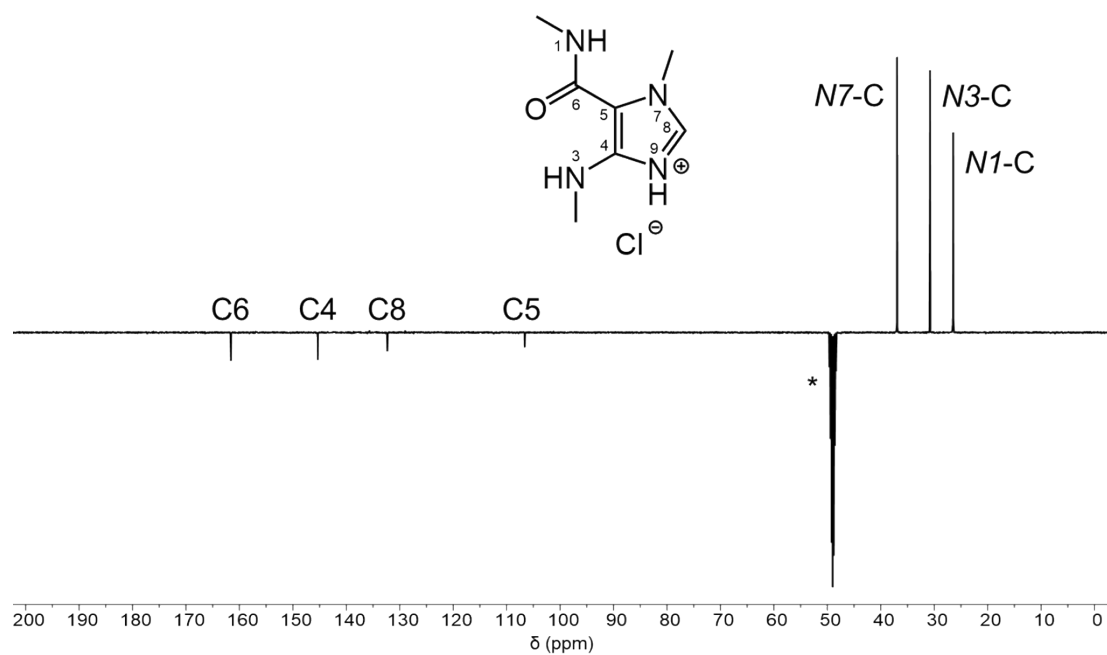

Figure SI-21. <sup>13</sup>C{<sup>1</sup>H}-APT NMR spectrum of **1**[Cl] in CD<sub>3</sub>OD at 298 K.

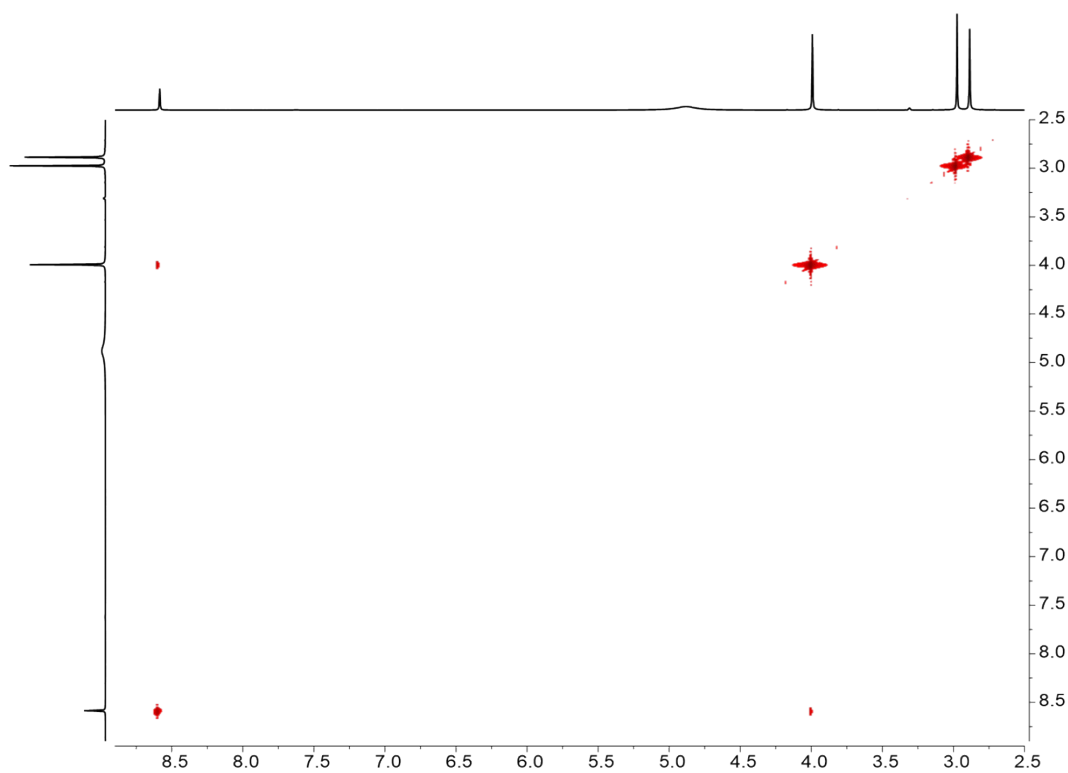

Figure SI-22. <sup>1</sup>H-<sup>1</sup>H COSY NMR spectrum of **1**[Cl] in CD<sub>3</sub>OD at 298 K.

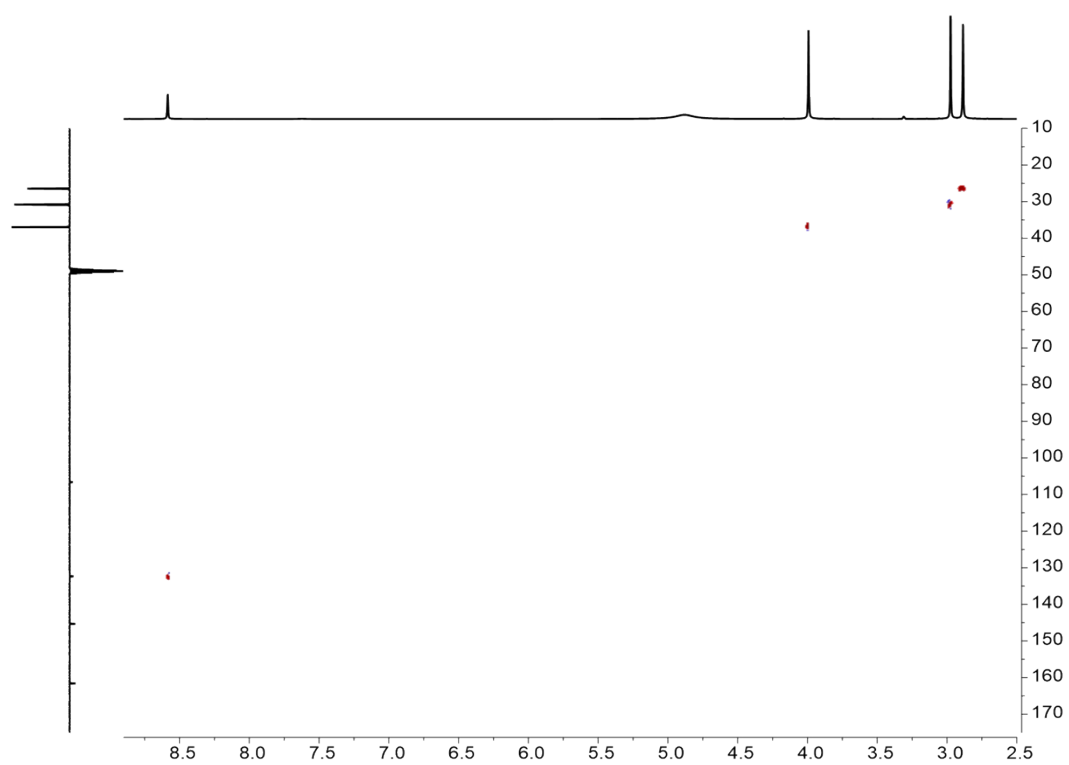

Figure SI-23.  $^1\text{H}$ - $^{13}\text{C}$  HSQC NMR spectrum of **1**[Cl] in  $\text{CD}_3\text{OD}$  at 298 K.

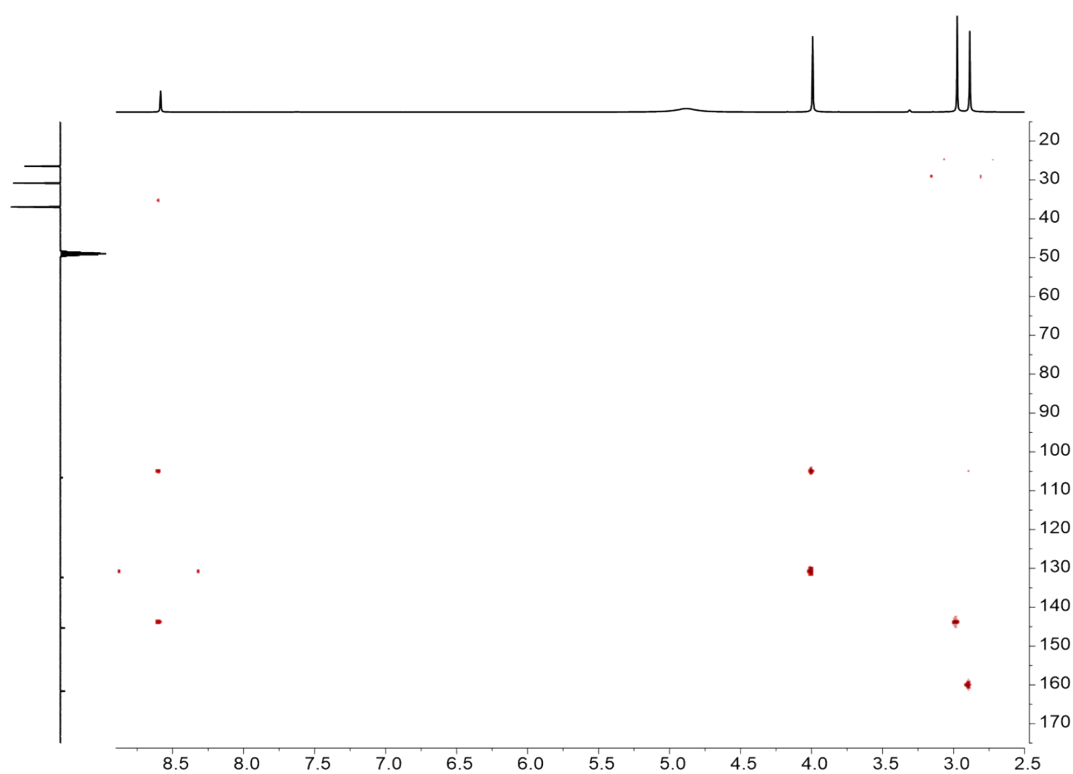

Figure SI-24.  $^1\text{H}$ - $^{13}\text{C}$  HMBC NMR spectrum of **1**[Cl] in  $\text{CD}_3\text{OD}$  at 298 K.

# NMR spectra of **2**[Cl]

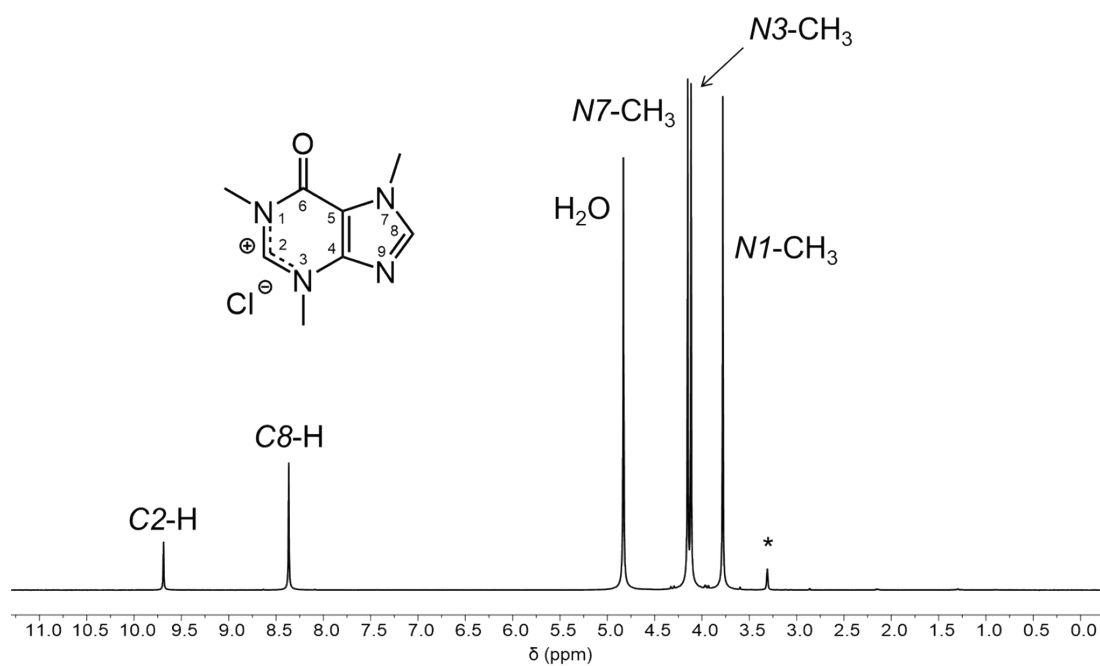

Figure SI-25.  $^1\text{H}$  NMR spectrum of **2**[Cl] in  $\text{CD}_3\text{OD}$  at 298 K.

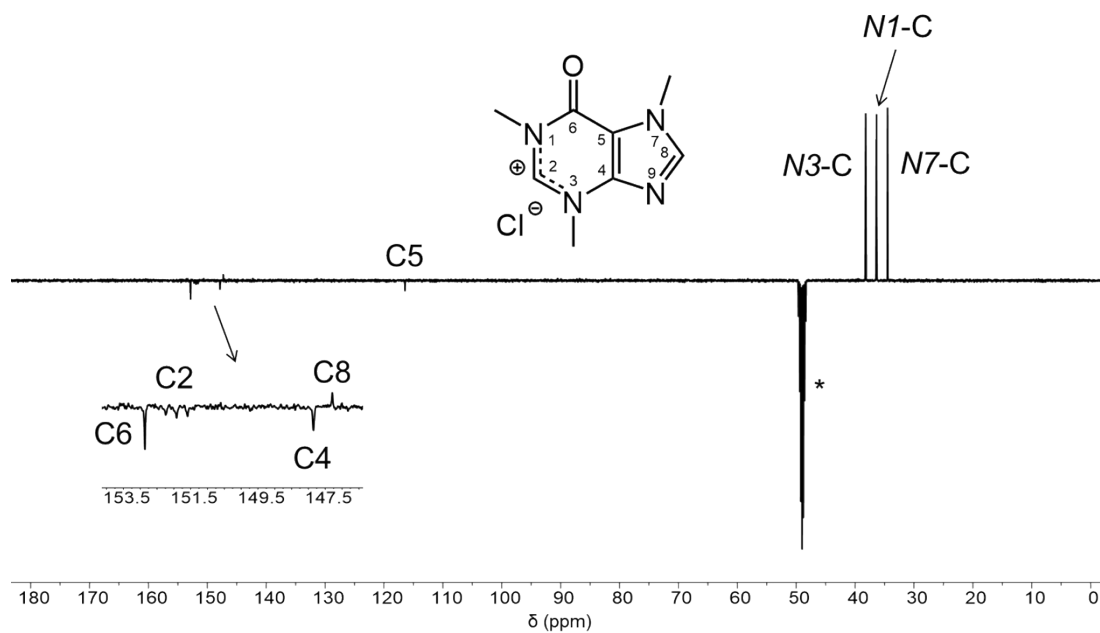

Figure SI-26.  $^{13}\text{C}\{^1\text{H}\}$ -APT NMR spectrum of **2**[Cl] in  $\text{CD}_3\text{OD}$  at 298 K.

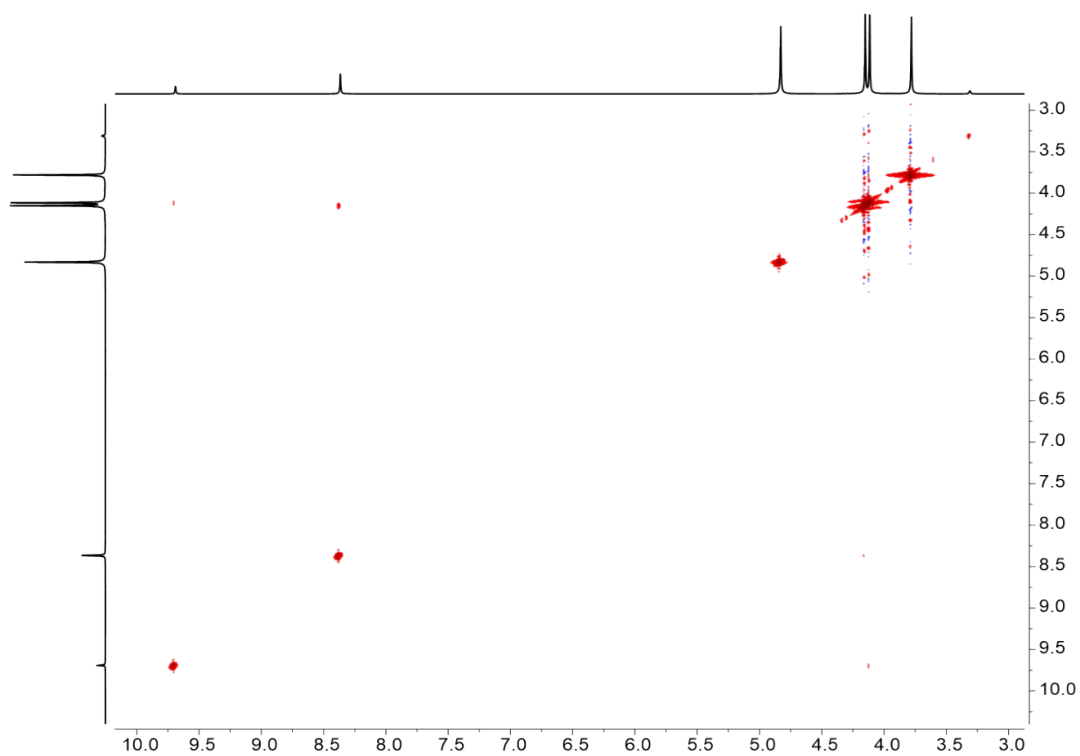

Figure SI-27.  $^1\text{H}$ - $^1\text{H}$  COSY NMR spectrum of **2**[Cl] in  $\text{CD}_3\text{OD}$  at 298 K.

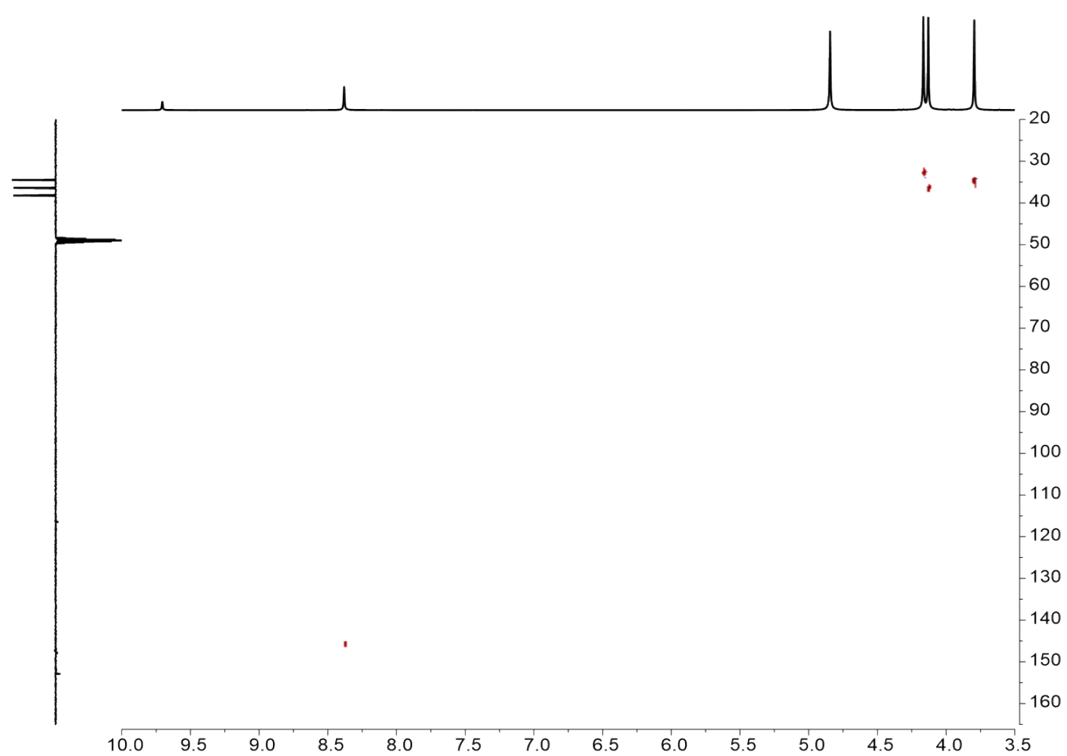

Figure SI-28.  $^1\text{H}$ - $^{13}\text{C}$  HSQC NMR spectrum of **2**[Cl] in  $\text{CD}_3\text{OD}$  at 298 K.

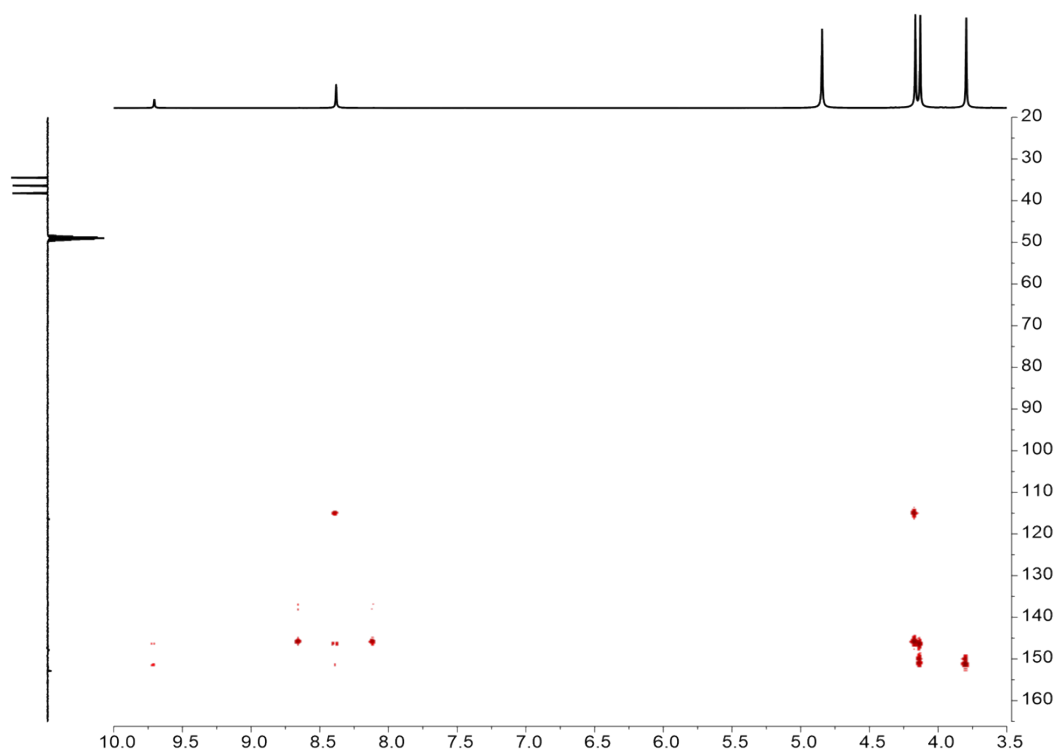

Figure SI-29.  $^1\text{H}$ - $^{13}\text{C}$  HMBC NMR spectrum of **2**[Cl] in  $\text{CD}_3\text{OD}$  at 298 K.

#### NMR spectra of **2**[PF<sub>6</sub>]

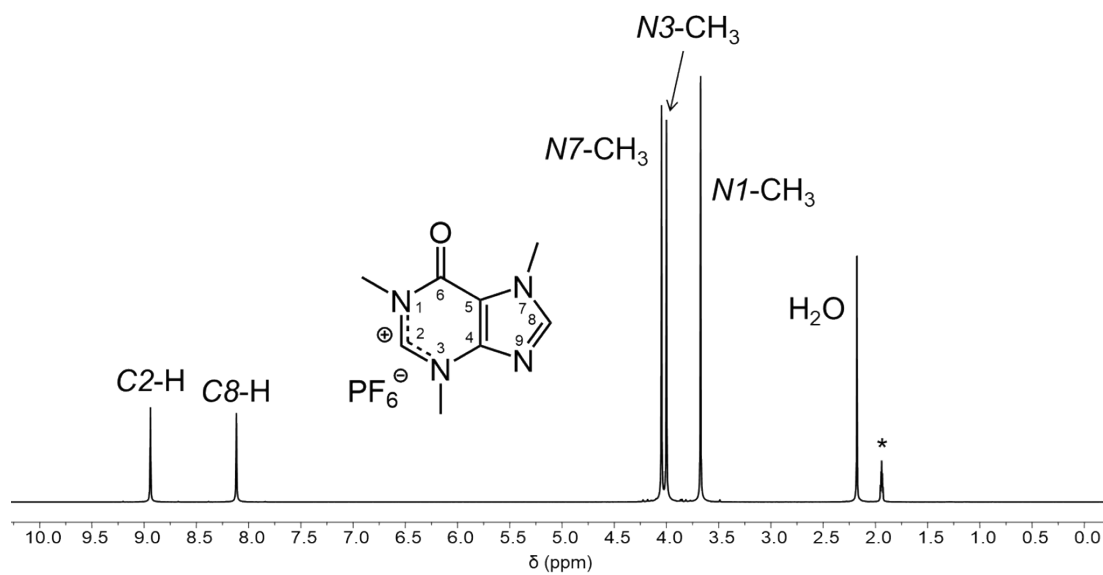

Figure SI-30.  $^1\text{H}$  NMR spectrum of **2**[PF<sub>6</sub>] in  $\text{CD}_3\text{CN}$  at 298 K.



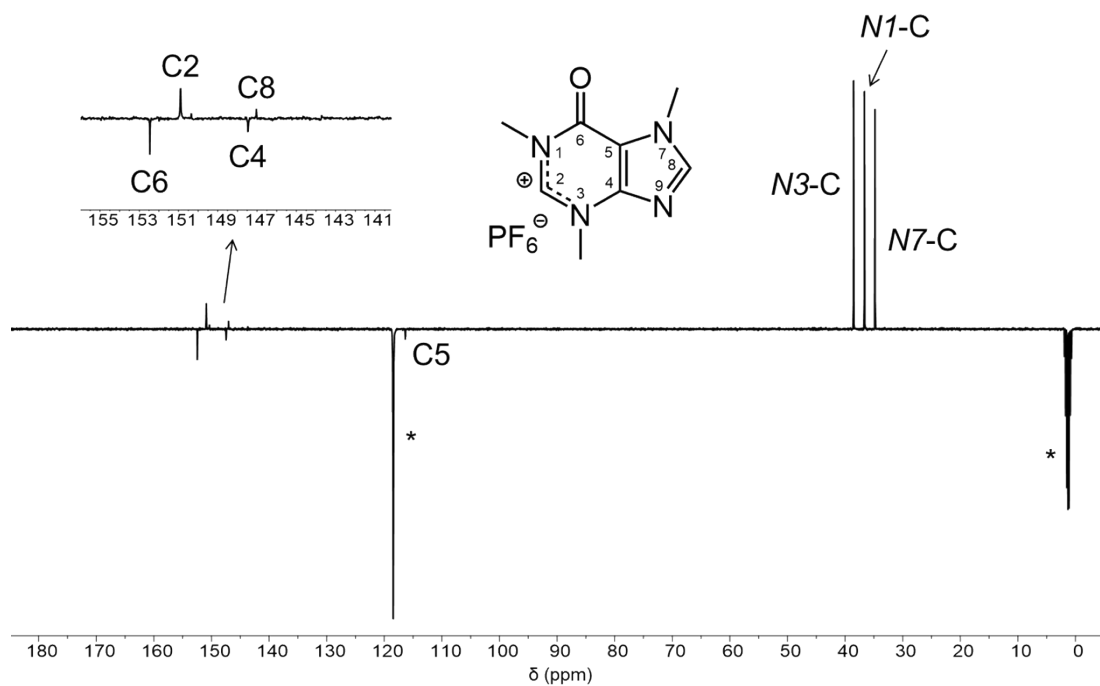

Figure SI-31. <sup>13</sup>C{<sup>1</sup>H}-APT NMR spectrum of **2**[PF<sub>6</sub>] in CD<sub>3</sub>CN at 298 K.

#### NMR spectra of **2**[Br]

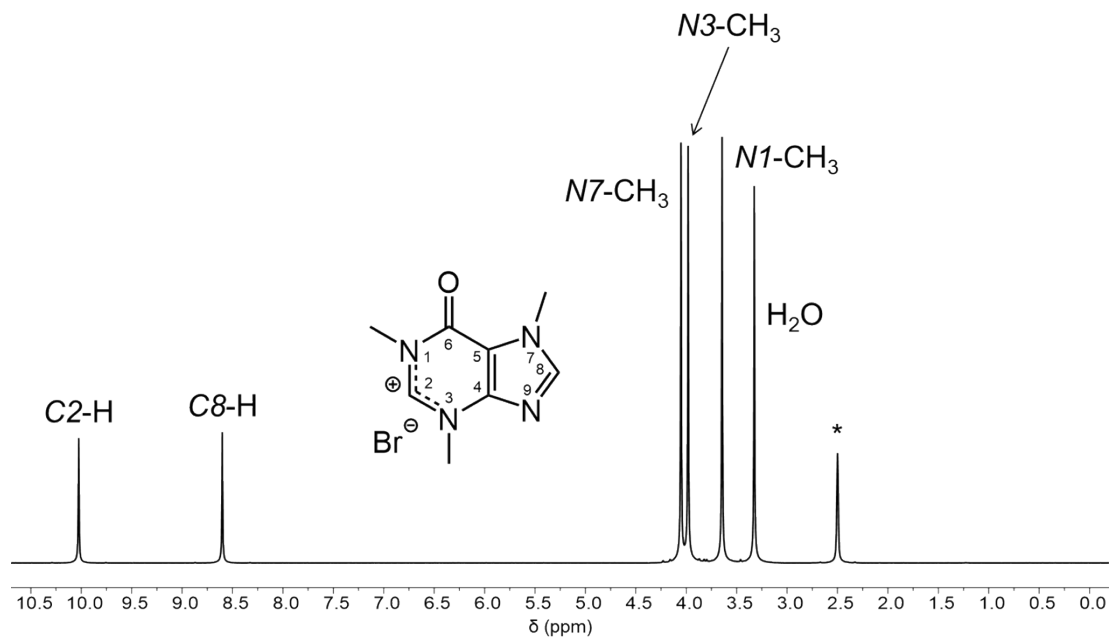

Figure SI-32. <sup>1</sup>H NMR spectrum of **2**[Br] in DMSO-*d*<sub>6</sub> at 298 K.

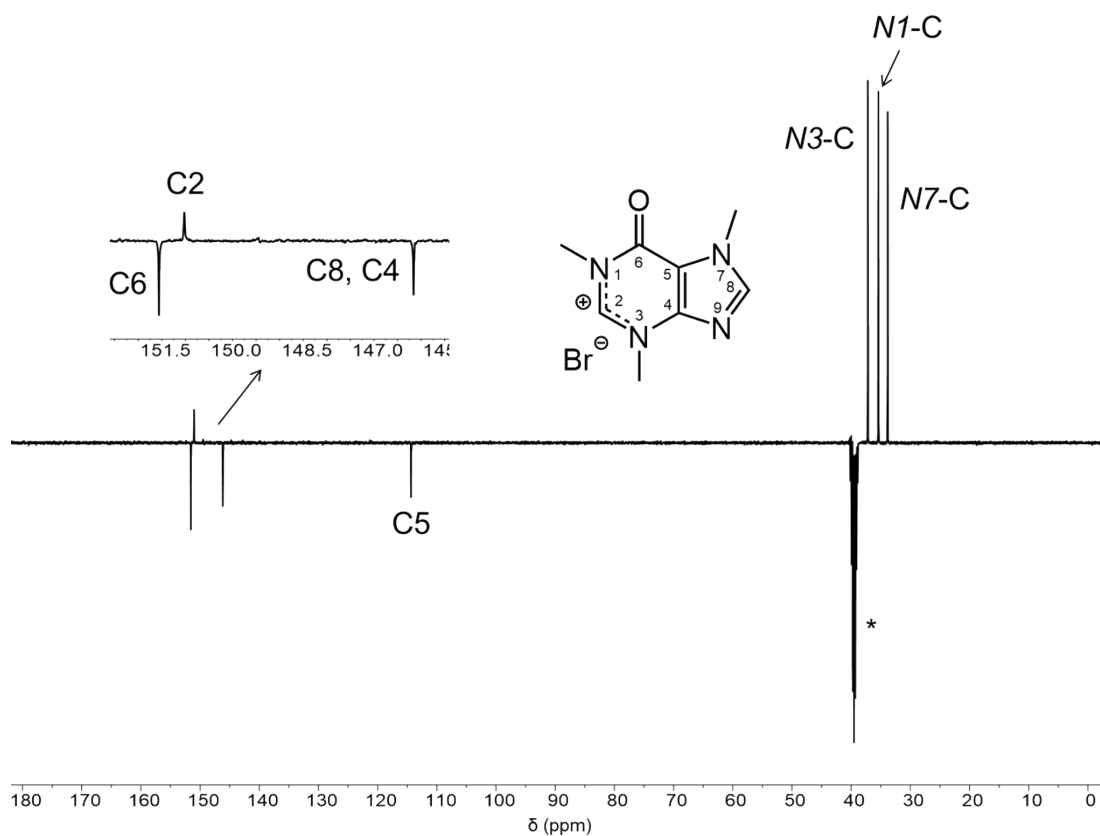

Figure SI-33.  $^{13}\text{C}\{^1\text{H}\}$ -APT NMR spectrum of **2**[Br] in  $\text{DMSO}-d_6$  at 298 K.

#### NMR spectra of **2**[I]

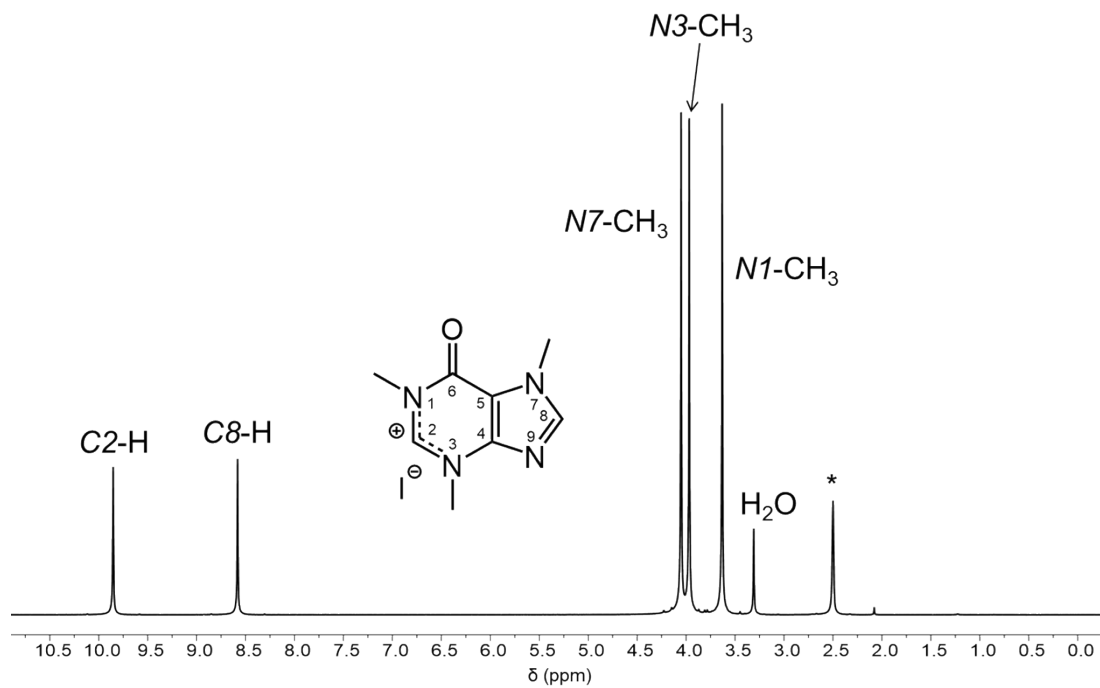

Figure SI-34.  $^1\text{H}$  NMR spectrum of **2**[I] in  $\text{DMSO}-d_6$  at 298 K.

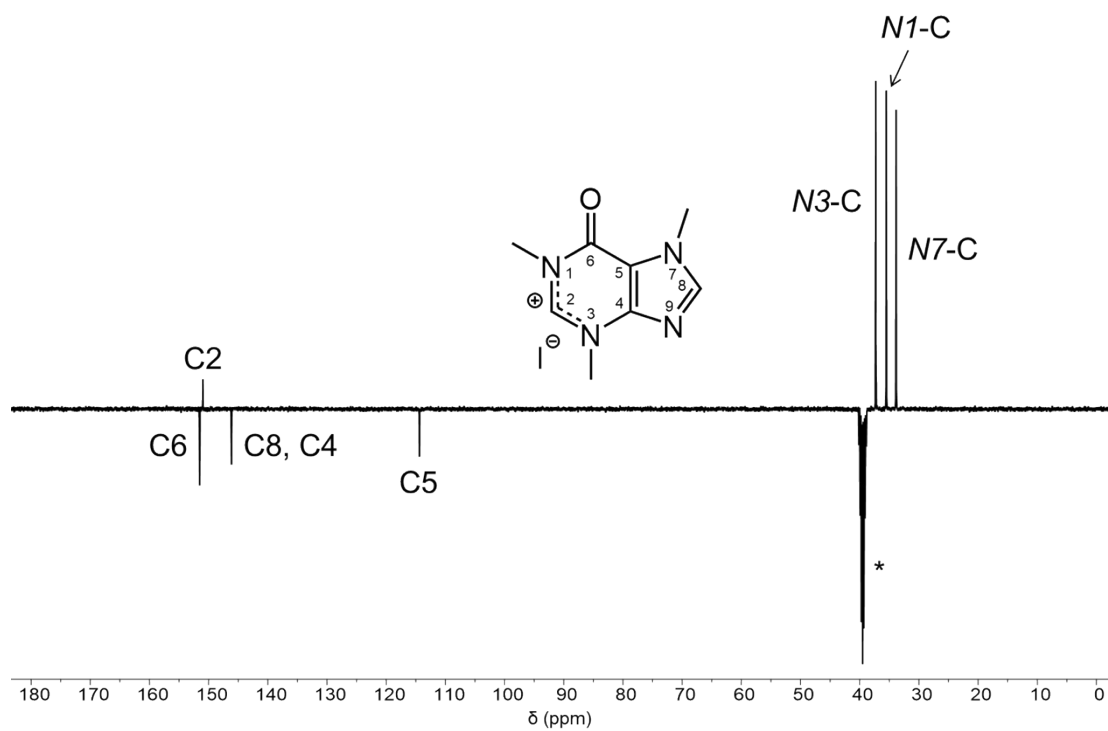

Figure SI-35.  $^{13}\text{C}\{^1\text{H}\}$ -APT NMR spectrum of **2**[I] in  $\text{DMSO-}d_6$  at 298 K.

#### NMR spectra of **3**[Cl]

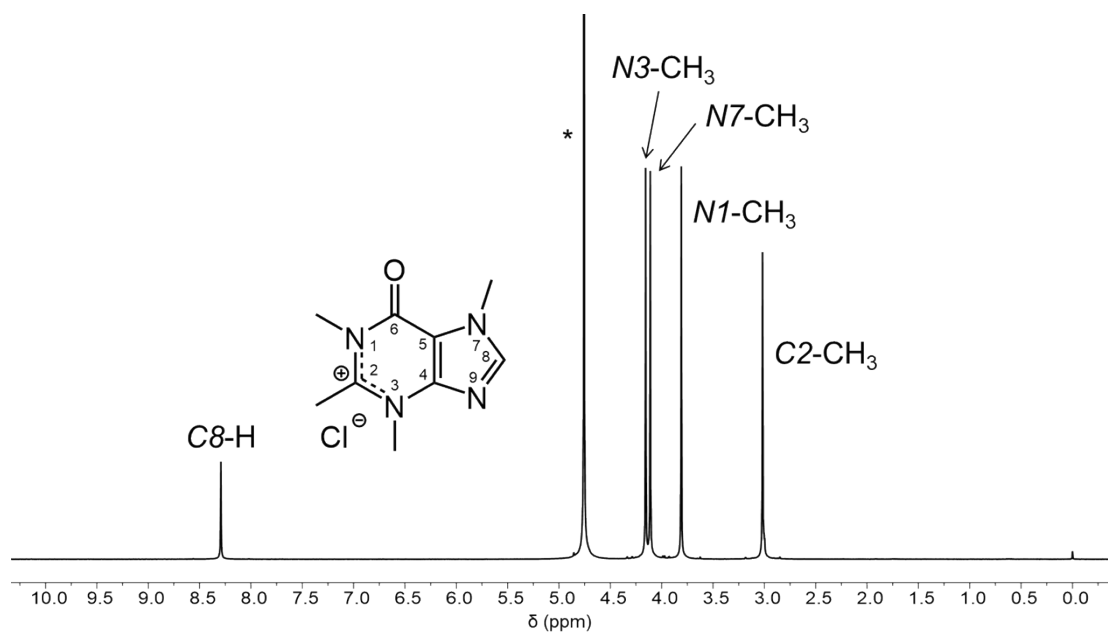

Figure SI-36.  $^1\text{H}$  NMR spectrum of **3**[Cl] in  $\text{D}_2\text{O}$  at 298 K.

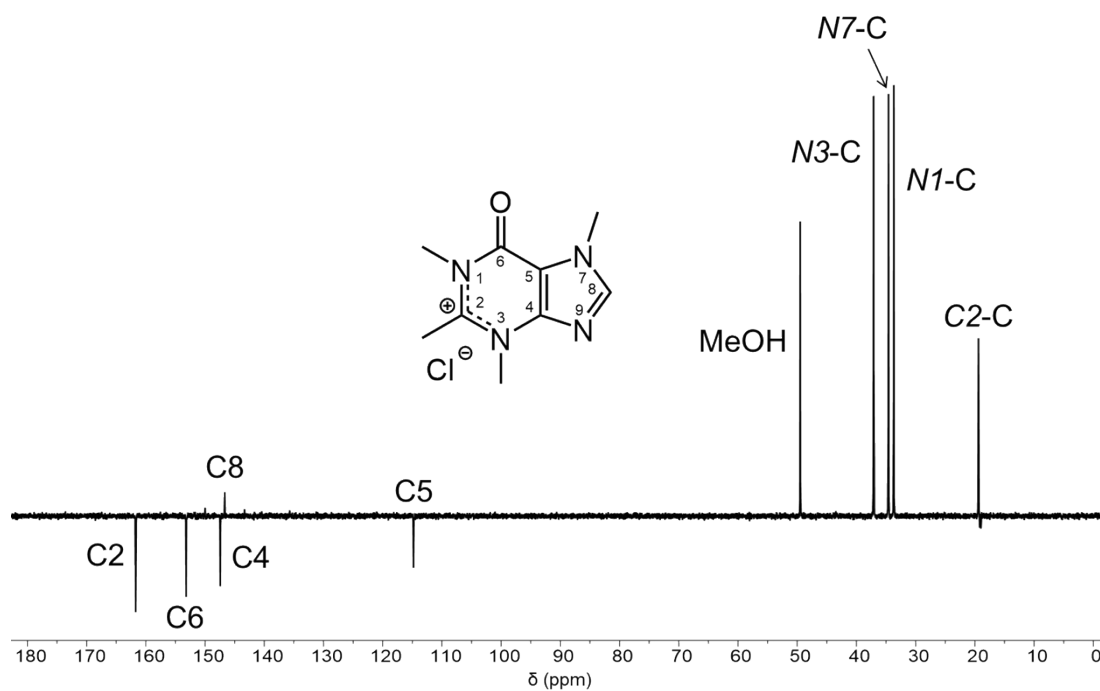

Figure SI-37.  $^{13}\text{C}\{^1\text{H}\}$ -APT NMR spectrum of **3[Cl]** in  $\text{D}_2\text{O}$  at 298 K.

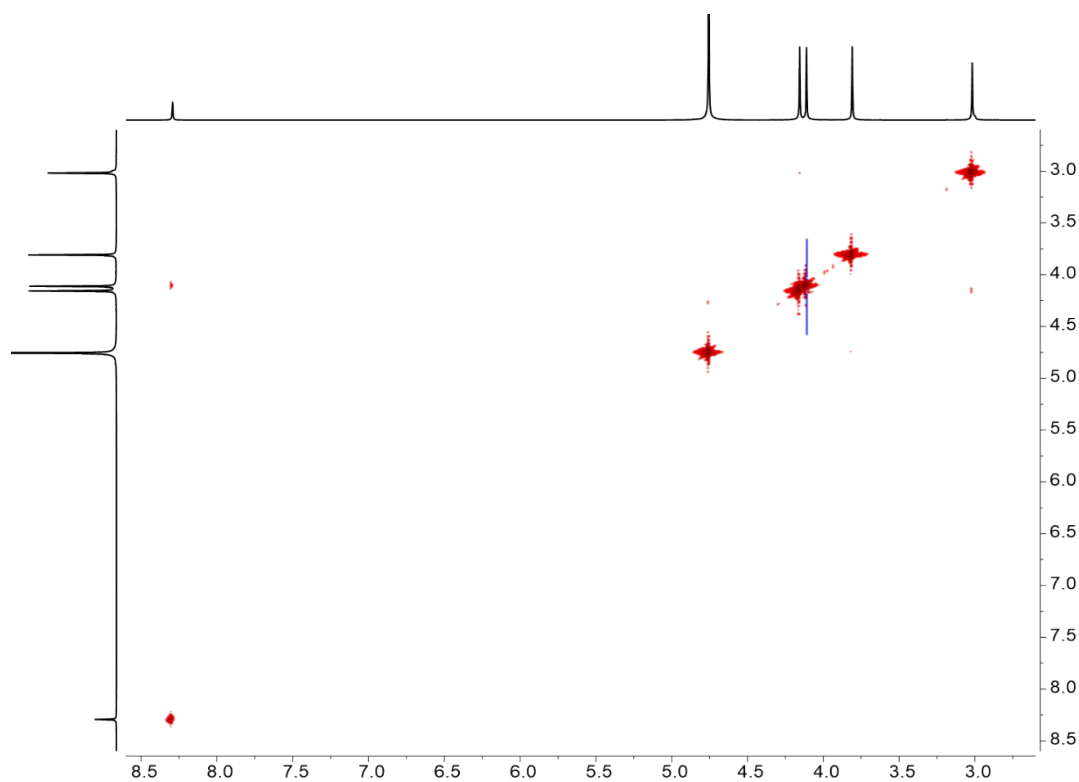

Figure SI-38.  $^1\text{H}$ - $^1\text{H}$  COSY NMR spectrum of **3[Cl]** in  $\text{D}_2\text{O}$  at 298 K.

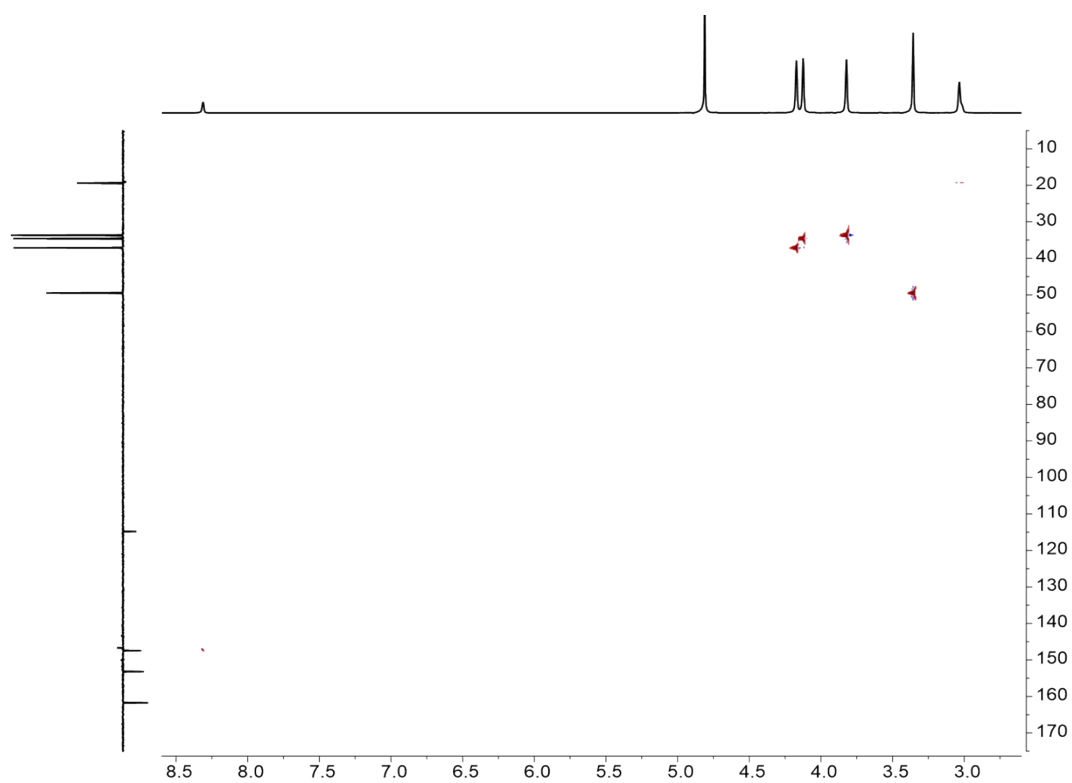

Figure SI-39.  $^1\text{H}$ - $^{13}\text{C}$  HSQC NMR spectrum of **3**[Cl] in  $\text{D}_2\text{O}$  at 298 K.

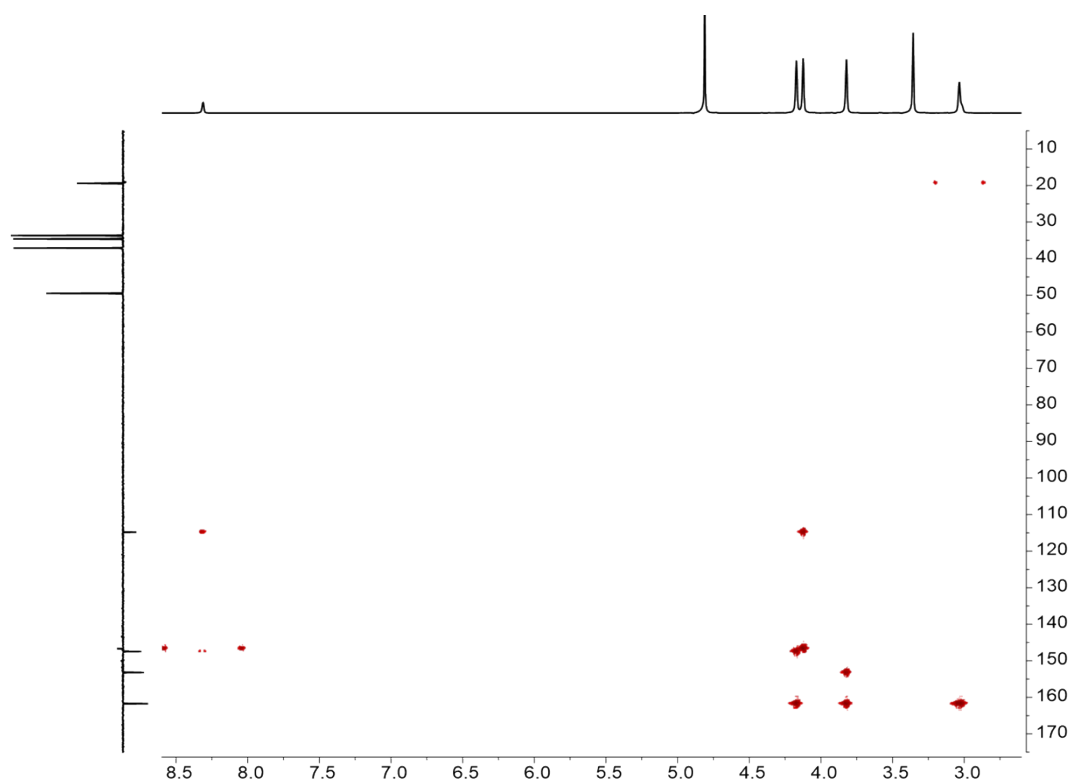

Figure SI-40.  $^1\text{H}$ - $^{13}\text{C}$  HMBC NMR spectrum of **3**[Cl] in  $\text{D}_2\text{O}$  at 298 K.

#### 4. Crystal structure determination

X-ray diffraction data of complexes **1**[NO<sub>3</sub>] (CCDC 2475635), **1**[Cl] (CCDC 2475636), **2**[NO<sub>3</sub>] (CCDC 2475637), **2**[Cl]·H<sub>2</sub>O (CCDC 2475638), **2**[Br]·H<sub>2</sub>O (CCDC 2475639), **2**[I] (CCDC 2475640), and **3**[Cl]·3H<sub>2</sub>O (CCDC 2475641) were collected on a Bruker D8 Venture diffractometer, with by graphite-monochromated Mo K $\alpha$  radiation ( $\lambda$  = 0.71073 Å). Single crystals were mounted and coated with perfluoropolyether oil. Diffracted intensities were integrated with SAINT,<sup>SI-3</sup> and corrected of absorption effects was performed with a multi-scan strategy by SADABS.<sup>SI-4, SI-5</sup> All structures were solved by direct methods with the software SHELXS<sup>SI-6</sup> and refined by full-matrix least squares on  $F^2$  with SHELXL program,<sup>SI-7</sup> and the WinGX<sup>SI-8</sup> or Olex2<sup>SI-9</sup> systems. In **2**[Cl]·H<sub>2</sub>O, the refined O–H bond lengths are slightly longer than commonly idealized values. As they are supported by electron density maps and remain chemically reasonable, no geometric restraints were applied during refinement. In **3**[Cl]·3H<sub>2</sub>O, the difference Fourier maps indicate possible minor disorder of the water hydrogen positions. However, this could not be modelled in a stable way, and a simplified model was therefore applied.

Crystal data for compound **1**[NO<sub>3</sub>]: C<sub>7</sub>H<sub>13</sub>N<sub>5</sub>O<sub>4</sub>,  $M_r$  = 231.22, colorless prisms, triclinic  $P\bar{1}$ ,  $a$  = 6.6071(4) Å,  $b$  = 7.9107(5) Å,  $c$  = 10.3623(6) Å,  $\alpha$  = 110.660(3)°,  $\beta$  = 97.406(3)°,  $\gamma$  = 90.598(3)°,  $V$  = 501.63(5) Å<sup>3</sup>,  $Z$  = 2,  $T$  = 100(2) K,  $D_{\text{calcd}}$  = 1.531 g cm<sup>-3</sup>,  $\mu$  = 0.126 mm<sup>-1</sup>, absorption correction factors min. 0.957 max. 0.969, 11707 reflections, 2780 unique ( $R_{\text{int}}$  = 0.0174), 2437 observed,  $R_1$  = 0.0375 [ $I > 2\sigma(I)$ ],  $wR_2(F^2)$  = 0.1074 (all data), GOF = 1.061. CCDC 2475635.

Crystal data for compound **1**[Cl]: C<sub>7</sub>H<sub>13</sub>ClN<sub>4</sub>O,  $M_r$  = 204.66, colorless prism, triclinic  $P\bar{1}$ ,  $a$  = 6.5053(3) Å,  $b$  = 7.8928(4) Å,  $c$  = 9.8692(5) Å,  $\alpha$  = 68.6656(14)°,  $\beta$  = 77.5428(14)°,  $\gamma$  = 87.0433(15)°,  $V$  = 460.70(4) Å<sup>3</sup>,  $Z$  = 2,  $T$  = 100(2) K,  $D_{\text{calcd}}$  = 1.475 g cm<sup>-3</sup>,  $\mu$  = 0.381 mm<sup>-1</sup>, absorption correction factors min. 0.959 max. 0.981, 19802 reflections, 2285 unique ( $R_{\text{int}}$  = 0.0231), 2261 observed,  $R_1$  = 0.0274 [ $I > 2\sigma(I)$ ],  $wR_2(F^2)$  = 0.0693 (all data), GOF = 1.086. CCDC 2475636.

Crystal data for compound **2**[NO<sub>3</sub>]: C<sub>8</sub>H<sub>11</sub>N<sub>5</sub>O<sub>4</sub>,  $M_r$  = 241.22, colorless prisms, monoclinic  $P2_1/c$ ,  $a$  = 11.7204(8) Å,  $b$  = 8.8224(6) Å,  $c$  = 10.3810(7) Å,  $\beta$  = 90.9287(9)°,  $V$  = 1073.28(13) Å<sup>3</sup>,  $Z$  = 4,  $T$  = 100(2) K,  $D_{\text{calcd}}$  = 1.493 g cm<sup>-3</sup>,  $\mu$  = 0.122 mm<sup>-1</sup>, absorption correction factors min. 0.880 max. 0.964, 13369 reflections, 2697 unique ( $R_{\text{int}}$  = 0.0315), 2130 observed,  $R_1$  = 0.0382 [ $I > 2\sigma(I)$ ],  $wR_2(F^2)$  = 0.0959 (all data), GOF = 1.028. CCDC 2475637.

Crystal data for compound **2**[Cl]·H<sub>2</sub>O: C<sub>8</sub>H<sub>13</sub>ClN<sub>4</sub>O<sub>2</sub>,  $M_r$  = 232.67, colorless block, monoclinic  $P2_1/c$ ,  $a$  = 11.2219(9) Å,  $b$  = 14.8838(13) Å,  $c$  = 6.4028(5) Å,  $\beta$  = 102.4031(11)°,  $V$  = 1044.46(15) Å<sup>3</sup>,  $Z$  = 4,  $T$  = 100(2) K,  $D_{\text{calcd}}$  = 1.480 g cm<sup>-3</sup>,  $\mu$  = 0.353 mm<sup>-1</sup>, absorption correction factors min. 0.886 max. 0.917, 18651 reflections, 2581 unique ( $R_{\text{int}}$  = 0.0233), 2339 observed,  $R_1$  = 0.0311 [ $I > 2\sigma(I)$ ],  $wR_2(F^2)$  = 0.0868 (all data), GOF = 1.054. CCDC 2475638.

Crystal data for compound **2**[Br]·H<sub>2</sub>O: C<sub>8</sub>H<sub>13</sub>BrN<sub>4</sub>O<sub>2</sub>,  $M_r$  = 277.13, colorless block, monoclinic  $P2_1/c$ ,  $a$  = 11.4500(3) Å,  $b$  = 15.0573(4) Å,  $c$  = 6.4762(2) Å,  $\beta$  = 103.1158(9)°,  $V$  = 1087.41(5) Å<sup>3</sup>,  $Z$  = 4,  $T$  = 100(2) K,  $D_{\text{calcd}}$  = 1.693 g cm<sup>-3</sup>,  $\mu$  = 3.768 mm<sup>-1</sup>, absorption correction factors min. 0.313 max. 0.547, 26996 reflections, 2689 unique ( $R_{\text{int}}$  = 0.0432), 2643 observed,  $R_1$  = 0.0198 [ $I > 2\sigma(I)$ ],  $wR_2(F^2)$  = 0.0530 (all data), GOF = 1.083. CCDC 2475639.

Crystal data for compound **2**[I]:  $C_8H_{11}IN_4O$ ,  $M_r = 306.11$ , colorless blocks, orthorhombic  $Pca21$ ,  $a = 11.3493(7) \text{ \AA}$ ,  $b = 11.5417(7) \text{ \AA}$ ,  $c = 8.4397(5) \text{ \AA}$ ,  $V = 1105.52(12) \text{ \AA}^3$ ,  $Z = 4$ ,  $T = 100(2) \text{ K}$ ,  $D_{\text{calcd}} = 1.839 \text{ g cm}^{-3}$ ,  $\mu = 2.873 \text{ mm}^{-1}$ , absorption correction factors min. 0.663 max. 0.795, 52792 reflections, 2745 unique ( $R_{\text{int}} = 0.0294$ ), 2742 observed,  $R_1 = 0.0110$  [ $I > 2\sigma(I)$ ],  $wR_2(F^2) = 0.0271$  (all data), GOF = 1.069. CCDC 2475640.

Crystal data for compound **3**[Cl]·3H<sub>2</sub>O:  $C_9H_{19}ClN_4O_4$ ,  $M_r = 282.73$ , colorless blocks, monoclinic  $P21/n$ ,  $a = 13.5822(5) \text{ \AA}$ ,  $b = 6.6192(2) \text{ \AA}$ ,  $c = 16.0458(7) \text{ \AA}$ ,  $\beta = 109.3822(15)^\circ$ ,  $V = 1360.81(9) \text{ \AA}^3$ ,  $Z = 4$ ,  $T = 100(2) \text{ K}$ ,  $D_{\text{calcd}} = 1.380 \text{ g cm}^{-3}$ ,  $\mu = 0.294 \text{ mm}^{-1}$ , absorption correction factors min. 0.952 max. 0.985, 38366 reflections, 3381 unique ( $R_{\text{int}} = 0.0596$ ), 2928 observed,  $R_1 = 0.0432$  [ $I > 2\sigma(I)$ ],  $wR_2(F^2) = 0.1301$  (all data), GOF = 1.044. CCDC 2475641.

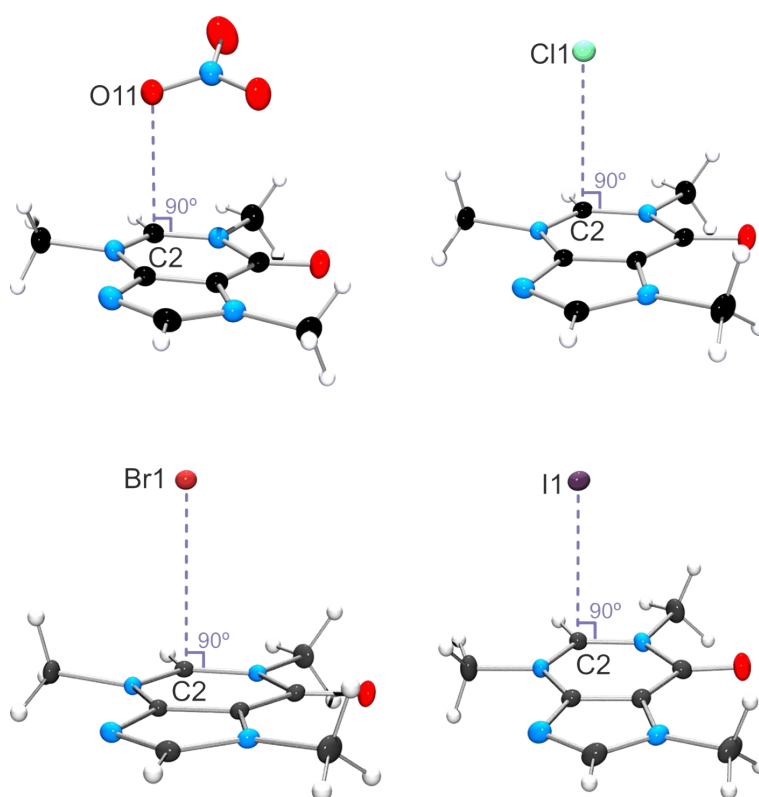

Figure SI-41. View of  $n \rightarrow \pi^*$  interactions in **2**[Cl]·H<sub>2</sub>O and **2**[NO<sub>3</sub>].

## 5. Hydrogen Bonding

**Table SI-1.** Geometrical parameters [ $\text{\AA}$ ,  $^\circ$ ] of hydrogen bonds.

| Compound                        | H bonds    | H...A     | D...A      | D-H...A    |
|---------------------------------|------------|-----------|------------|------------|
| Cation...Water                  |            |           |            |            |
| <b>2</b> [Cl]·H <sub>2</sub> O  | O1w-H...Cl | 2.16(4)   | 3.2646(12) | 165(3)     |
|                                 |            | 2.22(3)   | 3.2702(14) | 156(2)     |
| <b>2</b> [Br]·H <sub>2</sub> O  | O1w-H...Br | 2.40(3)   | 3.4011(12) | 171(2)     |
|                                 |            | 2.42(3)   | 3.4054(12) | 161(3)     |
| <b>3</b> [Cl]·3H <sub>2</sub> O | O1w-H...Cl | 2.2176(5) | 3.0747(16) | 175.58(9)  |
|                                 |            | 2.2236(4) | 3.0893(15) | 174.46(11) |
| Cation...Anion                  |            |           |            |            |
| <b>2</b> [Cl]·H <sub>2</sub> O  | C2-H2...Cl | 2.519(18) | 3.4122(13) | 168.2(14)  |
| <b>2</b> [Cl]·H <sub>2</sub> O  | C8-H8...Cl | 2.650(17) | 3.5784(14) | 178.5(14)  |
| <b>2</b> [Br]·H <sub>2</sub> O  | C2-H2...Br | 2.615(3)  | 3.5475(13) | 167.16(7)  |
| <b>2</b> [Br]·H <sub>2</sub> O  | C8-H8...Br | 2.745(3)  | 3.6906(13) | 174.04(8)  |
| <b>2</b> [I]                    | C2-H2...I  | 2.8136(3) | 3.7312(18) | 162.48(11) |
| <b>2</b> [I]                    | C8-H8...I  | 2.9909(3) | 3.859(2)   | 152.54(13) |
| <b>3</b> [Cl]·3H <sub>2</sub> O | C8-H8...Cl | 2.7291(5) | 3.5671(19) | 147.48(11) |

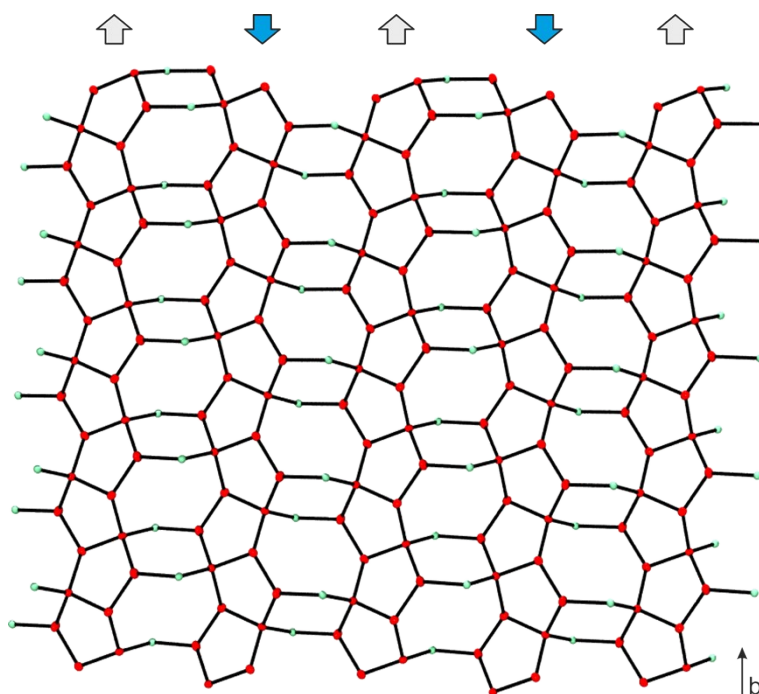

Figure SI-42. Hydrogen bonding pattern in **3**[Cl]·3H<sub>2</sub>O. Red: O atoms. Green: Cl<sup>-</sup> anions.



## 6. Computational details

DFT electronic structure calculations were carried out with Gaussian16 using the M06-2X functional and the all-electron jorge-TZP basis set for all atoms. Interaction energies were calculated by means of the supermolecule approach and corrected for the BSSE with the Counterpoise method. NBO/NPA analyses were performed with the NBO3.1 module included in Gaussian16 and the corresponding orbitals represented with IQMol 2.15.0 ( $s = 0.05 \text{ \AA}^{-3}$ ). We used AIMAll for the topological analysis of the electron density within the QTAIM framework. MEP maps were built on the corresponding 0.001 au isosurfaces with GaussView. Interatomic distances are given throughout the article as penetration indexes. The penetration index  $p_{AB}$  indicates the degree of interpenetration of the van der Waals crusts of atoms A and B, from 0% (canonical vdW contact) to 100% (canonical bond distance) and is defined as  $p_{AB} = 100(v_A + v_B - d_{AB})/(v_A + v_B - r_A + r_B)$  where ' $v$ ' is the van der Waals radius and ' $r$ ' the covalent radius of a given atom. For computing  $p$  we used standard sets of van der Waals<sup>SI-10</sup> and covalent<sup>SI-11</sup> radii. Further details on the use of penetration indexes and their applications can be found in a recent publication.<sup>SI-12</sup>

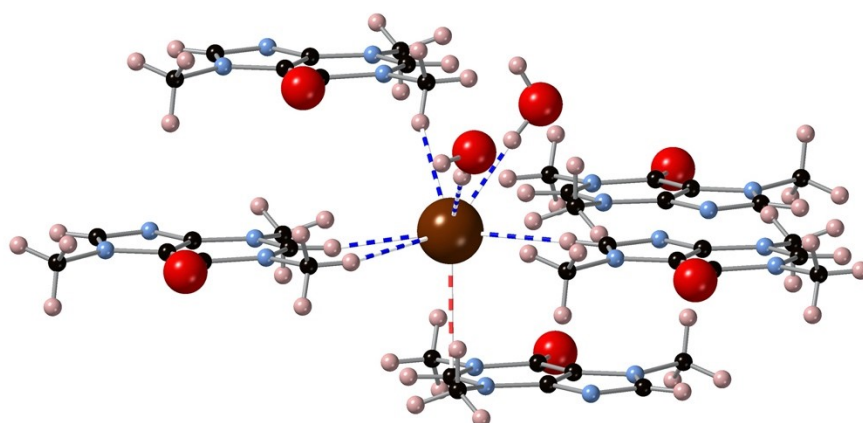

Figure SI-43. Short contacts between bromide and the surrounding atoms in  $2[\text{Br}]\cdot\text{H}_2\text{O}$ .

## 7. Hirshfeld surface and fingerprint plot analysis

Hirshfeld surfaces and fingerprint plots of  $2[\text{Cl}]\cdot\text{H}_2\text{O}$  and  $2[\text{Br}]\cdot\text{H}_2\text{O}$  were generated and analyzed using *Crystal Explorer*.<sup>SI-13</sup> As stated in the main text, fingerprint plots display similar features: Figure 2 for  $2[\text{Br}]\cdot\text{H}_2\text{O}$  and Figure SI-42 for  $2[\text{Cl}]\cdot\text{H}_2\text{O}$ .

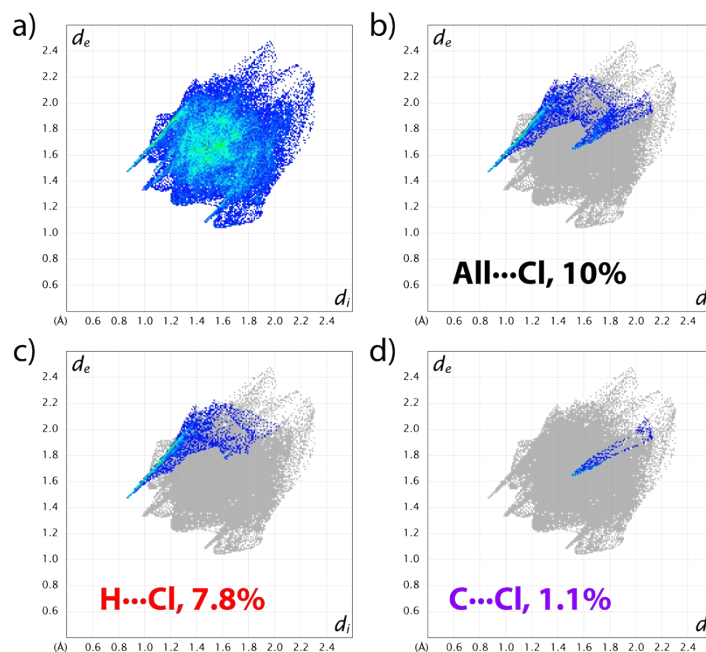

Figure SI-44. Fingerprint plot for cation **2** in  $2[\text{Cl}]\cdot\text{H}_2\text{O}$ . a) All contacts; b) Contacts involving Cl as outside atom; c)  $\text{H}\cdots\text{Cl}$  contacts; d)  $\text{C}\cdots\text{Cl}$  contacts.

## 8. Quantum crystallography

**Data collection strategy.** Diffraction images were collected with a fixed sample-detector distance (42 mm) using narrow frames ( $0.3^\circ$   $\omega$  or  $\phi$  rotation) at different detector positions ( $2\theta = 46.93^\circ, 64.70^\circ$ ) in order to assure a perfect coverage of all independent reflections. The exposure time was adapted for each position (7, 20 s, respectively). Integration of diffraction images were performed enables least square profile fitting, and using recurrence background and a flexible integration box size. Analysis of the reflection data is summarized in Table SI-2.

**Table SI-2.** Analysis of reflection data: number of reflections collected (#data) and theoretical (#theo), completeness (%Comp), redundancy (red), mean intensity ( $\langle I \rangle$ ), mean Intensity over sigma ( $\langle I/\sigma \rangle$ ), statistical agreement factors  $R_{\text{merge}}$  and  $R_{\text{sigma}}$ .

| Resolution  | #Data | #Theo | %Comp  | Red   | $\langle I \rangle$ | $\langle I/\sigma \rangle$ | $R_{\text{merge}}$ | $R_{\text{sigma}}$ |
|-------------|-------|-------|--------|-------|---------------------|----------------------------|--------------------|--------------------|
| Inf- 1.75   | 235   | 237   | 99.20  | 11.92 | 62.41               | 59.77                      | 0.0340             | 0.0206             |
| 1.75 - 1.15 | 566   | 566   | 100.00 | 23.11 | 30.08               | 88.49                      | 0.0327             | 0.0178             |
| 1.15 - 0.91 | 774   | 774   | 100.00 | 28.27 | 17.06               | 95.93                      | 0.0276             | 0.0111             |
| 0.91 - 0.79 | 825   | 825   | 100.00 | 28.76 | 9.22                | 87.23                      | 0.0303             | 0.0086             |
| 0.79 - 0.72 | 749   | 749   | 100.00 | 27.00 | 6.16                | 76.35                      | 0.0362             | 0.0096             |
| 0.72 - 0.67 | 783   | 783   | 100.00 | 25.97 | 4.78                | 66.68                      | 0.0412             | 0.0106             |
| 0.67 - 0.63 | 764   | 764   | 100.00 | 25.47 | 3.44                | 57.28                      | 0.0497             | 0.0123             |
| 0.63 - 0.59 | 1015  | 1015  | 100.00 | 24.39 | 2.53                | 48.60                      | 0.0589             | 0.0149             |
| 0.59 - 0.57 | 636   | 636   | 100.00 | 22.42 | 1.78                | 37.01                      | 0.0757             | 0.0199             |
| 0.57 - 0.55 | 696   | 696   | 100.00 | 21.44 | 1.61                | 34.70                      | 0.0858             | 0.0221             |
| 0.55 - 0.53 | 817   | 817   | 100.00 | 21.03 | 1.27                | 29.48                      | 0.1009             | 0.0265             |
| 0.53 - 0.51 | 959   | 959   | 100.00 | 20.68 | 0.95                | 24.13                      | 0.1208             | 0.0335             |
| 0.51 - 0.49 | 1099  | 1099  | 100.00 | 19.22 | 0.74                | 19.68                      | 0.1479             | 0.0429             |
| 0.49 - 0.48 | 645   | 645   | 100.00 | 17.46 | 0.61                | 16.18                      | 0.1786             | 0.0546             |
| 0.48 - 0.47 | 678   | 678   | 100.00 | 15.03 | 0.53                | 13.37                      | 0.2006             | 0.0674             |
| 0.47 - 0.46 | 732   | 732   | 100.00 | 14.00 | 0.45                | 12.42                      | 0.1973             | 0.0720             |
| 0.46 - 0.45 | 824   | 824   | 100.00 | 12.79 | 0.38                | 10.57                      | 0.2208             | 0.0866             |
| 0.45 - 0.44 | 873   | 873   | 100.00 | 11.79 | 0.33                | 9.06                       | 0.2507             | 0.1028             |
| 0.44 - 0.43 | 965   | 965   | 100.00 | 9.30  | 0.30                | 6.93                       | 0.2834             | 0.1342             |
| 0.43 - 0.42 | 1001  | 1004  | 92.70  | 5.43  | 0.23                | 4.19                       | 0.3161             | 0.2475             |
| 0.52 - 0.42 | 7304  | 7382  | 98.90  | 13.35 | 0.48                | 12.29                      | 0.1795             | 0.0779             |
| Inf- 0.42   | 15629 | 15709 | 99.50  | 19.16 | 4.69                | 37.47                      | 0.0437             | 0.0182             |

**Experimental electron density model:** An additional data set of  $2[\text{Br}] \cdot \text{H}_2\text{O}$  was recorded until high resolution. Refinement of the high-quality data allowed to determine a partial occupancy factor for the water molecule. The structural model of  $2[\text{Br}] \cdot \text{H}_2\text{O}$  obtained with Olex2<sup>SI-9</sup> was imported as initial model to MoPro software.<sup>SI-14</sup>

Independent atom model was refined by full-matrix least square refinement of scale factor using a  $I > 3\sigma(I)$  threshold as follow: i) scale factor at whole resolution, ii) coordinates and anisotropic displacement parameters of non-H atoms (excluding water) with high order resolution data ( $\sin\theta/\lambda > 0.8 \text{ \AA}^{-1}$ ). Hydrogen atoms have been included in the model in calculated positions. The anisotropic displacement of hydrogen atoms (excluding those of water) have been constrained to the values obtained with SHADE3 server.<sup>SI-15</sup> Anharmonic thermal motion description up to fourth order of Gram-Charlier expansion was used for bromine atom, as the achieved resolution is close to the required value ( $0.42 \text{ \AA}$ ) following Kuhn's rule.<sup>SI-16</sup> At the end of the IAM refinement,

the scale factor was refined using all the data set resolution in order to calculate dynamic deformation charge density maps (Figure SI-51).

Asphericity of the electron density distribution of **2**[Br]·H<sub>2</sub>O has been considered with a multipolar refinement using Hansen-Coppens formalism:<sup>SI-17</sup>

$$\rho(\vec{r}) = \rho_{core}(r) + P_{val}(\kappa.r) + \sum_{l=0}^{l_{max}} \kappa'^3 R_{n_l}(\kappa'.r) \sum_{m=0}^l P_{lm} y_{lm \pm}(\theta, \varphi)$$

Where the two first terms correspond to spherical core and valence density, and the third term represents the aspherical part of the valence density (defined with the atomic local axes detailed in Table SI-3).

The charge density of **2**[Br]·H<sub>2</sub>O was refined against  $F^2$  with *MoPro* program,<sup>SI-13</sup> using all the resolution. Multipoles were restrained to dipole level for H atoms, octupolar level for C, N and O, and hexadecapolar level for bromine atom. Multipolar parameters were refined in successive steps. Chemical and symmetry restraints (Table SI-4) were used in the initial steps of the refinement and subsequently released. The expansion/contraction parameters ( $\kappa$  and  $\kappa'$ ) of hydrogen atoms were restrained to the 1.16(2) value.  $\kappa'$  parameters of hydrogen atoms of water molecule were kept fixed with a 1.16 value.

Multipolar refinement was carried out in systematic steps, refining scale factor, valence population ( $P_{val}$ ), multipole population  $P_{lm}$ ; and expansion/contraction factors  $\kappa$ , refined together with positions and atomic displacement parameters; expansion/contraction factors  $\kappa'$  were refined separately. First steps of the refinement were performed using symmetry restraints and reflections with  $I/\sigma > 3$ . Once all the parameters have converged, reflections with  $I/\sigma > 0$  were used and restraints were released.

Final residual density maps are depicted in Figure SI-47. Highest residues are observed close to bromine atom core. Refinement details are reported in Table SI-5.

**Table SI-3.** Atomic local axis system.

| Atom          | Axis definition | Atom          | Axis definition |
|---------------|-----------------|---------------|-----------------|
| Br1           | bZX C2 O1W      | H31, H32, H33 | ZX C3 N3        |
| N1            | bXY C6 C2       | C4            | bXY N3 N9       |
| N3            | bXY C4 C2       | C5            | bXY C6 C4       |
| N7            | bXY C8 C5       | C6            | bXY O6 N1       |
| N9            | bXY C4 C8       | C7            | ZX N7 H73       |
| O6            | XY C6 N1        | H71, H72, H73 | ZX C7 N7        |
| C1            | ZX N1 H12       | C8            | bXY N7 N9       |
| H11, H12, H13 | ZX C1 N1        | H8            | ZX C8 N7        |
| C2            | bXY N3 N1       | O1W           | bZX Br1 C3      |
| H2            | ZX C2 N3        | H1W           | ZX O1W C3       |
| C3            | ZX N3 H31       | H2W           | ZX O1W Br1      |

**Table SI-4.** Local restraints used in initial steps of the refinement.

| Geometrical restraints (kept throughout the entire refinement)             |     |     |      |      |       |       |        |      |      |     |      |      |     |     |       |
|----------------------------------------------------------------------------|-----|-----|------|------|-------|-------|--------|------|------|-----|------|------|-----|-----|-------|
| DISTAN                                                                     | C1  | 1   | H11  | 1    | 1.095 | 0.005 | SIMDIS | 1    | C1   | H11 | C1   | H12  | C1  | H13 | 0.005 |
| DISTAN                                                                     | C1  | 1   | H12  | 1    | 1.095 | 0.005 | SIMDIS | 1    | N1   | H11 | N1   | H12  | N1  | H13 | 0.005 |
| DISTAN                                                                     | C1  | 1   | H13  | 1    | 1.095 | 0.005 | SIMDIS | 1    | H11  | H12 | H11  | H13  | H12 | H13 | 0.005 |
| DISTAN                                                                     | C2  | 1   | H2   | 1    | 1.083 | 0.005 | SIMDIS | 1    | N3   | H2  | N1   | H2   |     |     | 0.005 |
| DISTAN                                                                     | C3  | 1   | H33  | 1    | 1.095 | 0.005 | SIMDIS | 1    | C3   | H33 | C3   | H32  | C3  | H31 | 0.005 |
| DISTAN                                                                     | C3  | 1   | H32  | 1    | 1.095 | 0.005 | SIMDIS | 1    | N3   | H33 | N3   | H32  | N3  | H31 | 0.005 |
| DISTAN                                                                     | C3  | 1   | H31  | 1    | 1.095 | 0.005 | SIMDIS | 1    | H33  | H32 | H33  | H31  | H32 | H31 | 0.005 |
| DISTAN                                                                     | C7  | 1   | H72  | 1    | 1.095 | 0.005 | SIMDIS | 1    | C7   | H72 | C7   | H73  | C7  | H71 | 0.005 |
| DISTAN                                                                     | C7  | 1   | H73  | 1    | 1.095 | 0.005 | SIMDIS | 1    | N7   | H72 | N7   | H73  | N7  | H71 | 0.005 |
| DISTAN                                                                     | C7  | 1   | H71  | 1    | 1.095 | 0.005 | SIMDIS | 1    | H72  | H73 | H72  | H71  | H73 | H71 | 0.005 |
| DISTAN                                                                     | C8  | 1   | H8   | 1    | 1.083 | 0.005 | SIMDIS | 1    | N7   | H8  | N9   | H8   |     |     | 0.005 |
| DISTAN                                                                     | O1W | 1   | H2W  | 1    | 0.983 | 0.005 | SIMDIS | 1    | O1W  | H2W | O1W  | H1W  |     |     | 0.005 |
| DISTAN                                                                     | O1W | 1   | H1W  | 1    | 0.983 | 0.005 |        |      |      |     |      |      |     |     |       |
| Local symmetry restraints                                                  |     |     |      |      |       |       |        |      |      |     |      |      |     |     |       |
| RSYMUL                                                                     | mz  |     | N1   | 1    | 0.01  |       | RSYMUL | mymz |      | N7  | 1    | 0.01 |     |     |       |
| RSYMUL                                                                     | mz  |     | N3   | 1    | 0.01  |       | RSYMUL | mymz |      | N9  | 1    | 0.01 |     |     |       |
| RSYMUL                                                                     | mz  |     | O6   | 1    | 0.01  |       | RSYMUL | mymz |      | C2  | 1    | 0.01 |     |     |       |
| RSYMUL                                                                     | mz  |     | C4   | 1    | 0.01  |       | RSYMUL | mymz |      | C8  | 1    | 0.01 |     |     |       |
| RSYMUL                                                                     | mz  |     | C5   | 1    | 0.01  |       | RSYMUL | 3m   |      | C1  | 1    | 0.01 |     |     |       |
| RSYMUL                                                                     | mz  |     | C6   | 1    | 0.01  |       | RSYMUL | 3m   |      | C3  | 1    | 0.01 |     |     |       |
|                                                                            |     |     |      |      |       |       | RSYMUL | 3m   |      | C7  | 1    | 0.01 |     |     |       |
| Similarity restraints                                                      |     |     |      |      |       |       |        |      |      |     |      |      |     |     |       |
| SIMPVM                                                                     | 1   | C1  | C3   | C7   | 0.01  |       |        |      |      |     |      |      |     |     |       |
| SIMKAP                                                                     | 1   | C1  | C3   | C7   | 0.01  |       |        |      |      |     |      |      |     |     |       |
| SIMPVM                                                                     | 1   | H11 | H12  | H13  | H31   | H32   | H33    | H71  | 0.01 |     |      |      |     |     |       |
| SIMPVM                                                                     | 1   | H11 | H12  | H13  | H31   | H32   | H33    | H71  | H72  | H73 | 0.01 |      |     |     |       |
| SIMPVM                                                                     | 1   | H2  | H8   |      | 0.01  |       |        |      |      |     |      |      |     |     |       |
| SIMPVM                                                                     | 1   | H1W | H2W  |      | 0.01  |       |        |      |      |     |      |      |     |     |       |
| Restraints in H atoms kappa values (kept throughout the entire refinement) |     |     |      |      |       |       |        |      |      |     |      |      |     |     |       |
| RESKP1                                                                     | H11 | 1   | 1.16 | 0.01 |       |       |        |      |      |     |      |      |     |     |       |
| RESKP2                                                                     | H11 | 1   | 1.16 | 0.01 |       |       |        |      |      |     |      |      |     |     |       |
| RESKP1                                                                     | H2  | 1   | 1.16 | 0.01 |       |       |        |      |      |     |      |      |     |     |       |
| RESKP2                                                                     | H2  | 1   | 1.16 | 0.01 |       |       |        |      |      |     |      |      |     |     |       |
| RESKP1                                                                     | H1W | WAT | 1.16 | 0.01 |       |       |        |      |      |     |      |      |     |     |       |
| RESKP2                                                                     | H1W | WAT | 1.16 | 0.01 |       |       |        |      |      |     |      |      |     |     |       |
| SIMKAP                                                                     | 1   | H11 | H12  | H13  | H31   | H32   | H33    | H71  | H72  | H73 | 0.01 |      |     |     |       |
| SIMKAP                                                                     | 1   | H2  | H8   |      | 0.01  |       |        |      |      |     |      |      |     |     |       |
| SIMKAP                                                                     | 1   | H1W | H2W  |      | 0.01  |       |        |      |      |     |      |      |     |     |       |

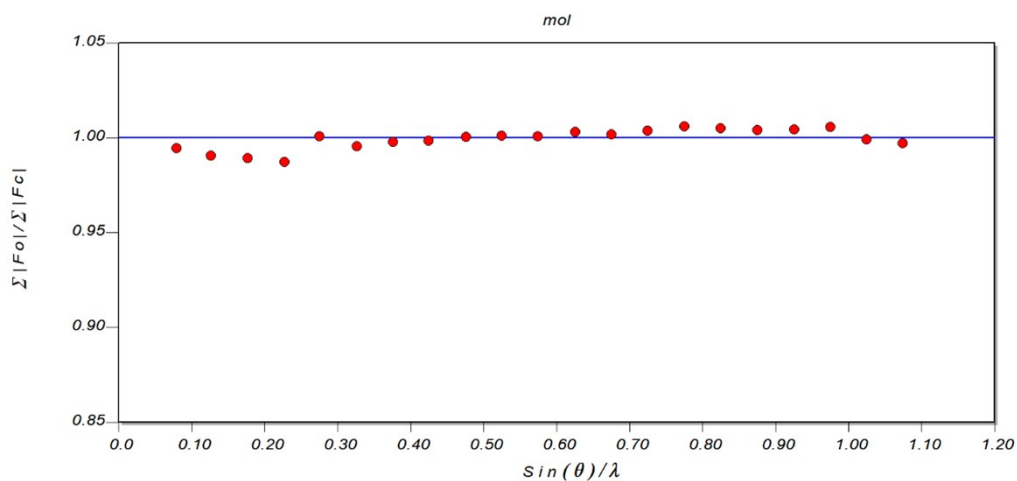

Figure SI-45. XDRK plot showing the fit of  $\sum(F_o^2)/\sum(F_c^2)$  as a function of resolution.

Note: Figures SI-46 and SI-47 depict the residual density maps, after the independent atom refinement (IAM) and multipolar refinement respectively, calculated on the same reflection dataset.

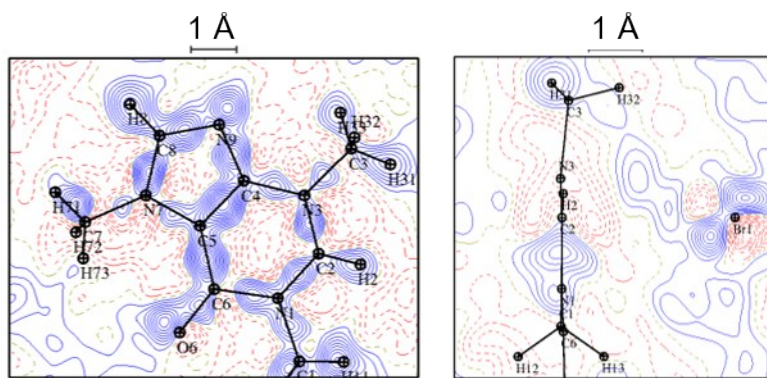

Figure SI-46. Residual density maps of  $2[\text{Br}] \cdot \text{H}_2\text{O}$  after IAM refinement, at contour level of  $0.05 \text{ e } \text{\AA}^{-3}$ , with  $\sin\theta/\lambda < 0.70 \text{ \AA}^{-1}$ . Mean planes defined by N7–N3–N1 and C2–Br1–N1 atoms, respectively.

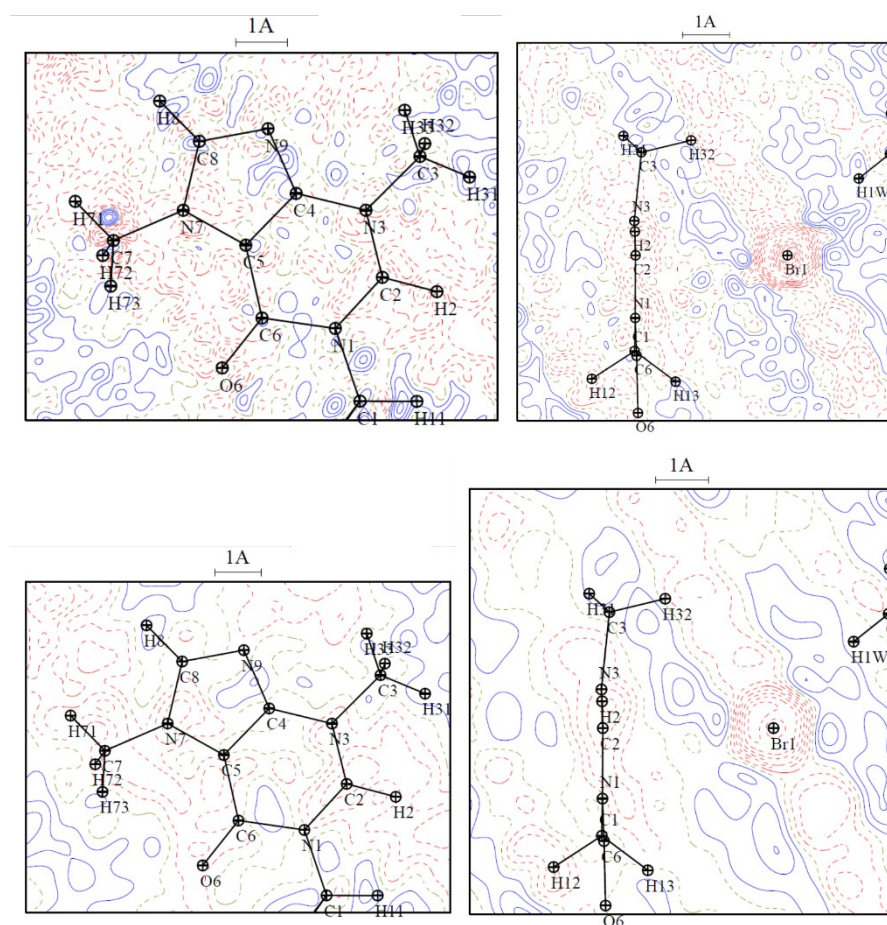

Figure SI-47. Residual density maps of **2[Br]·H<sub>2</sub>O** after multipolar refinement, at contour level of  $0.05 \text{ e } \text{\AA}^{-3}$ , with all resolution (up) and with  $\sin\theta/\lambda > 0.70 \text{ \AA}^{-1}$  (down) Mean planes defined by N7–N3–N1 and C2–Br1–N1 atoms, respectively.

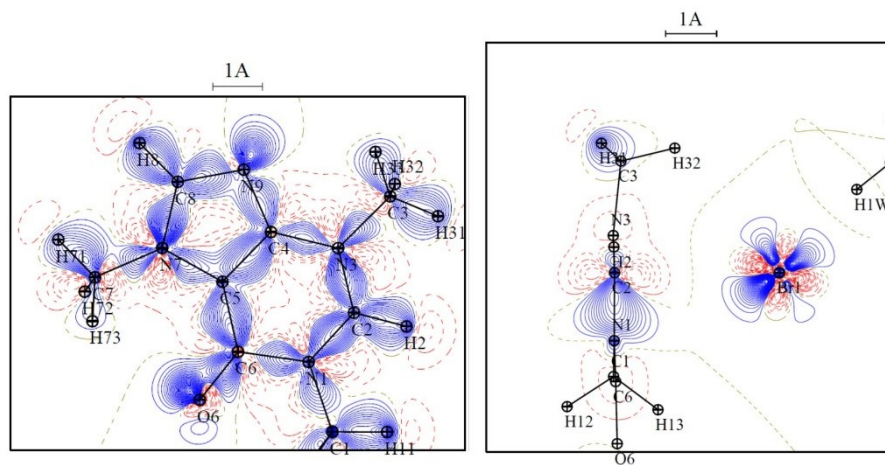

Figure SI-48. Static deformation maps of **2[Br]·H<sub>2</sub>O** after multipolar refinement, at contour level of  $0.05 \text{ e } \text{\AA}^{-3}$ . Mean planes defined by N7–N3–N1 and C2–Br1–N1 atoms, respectively.



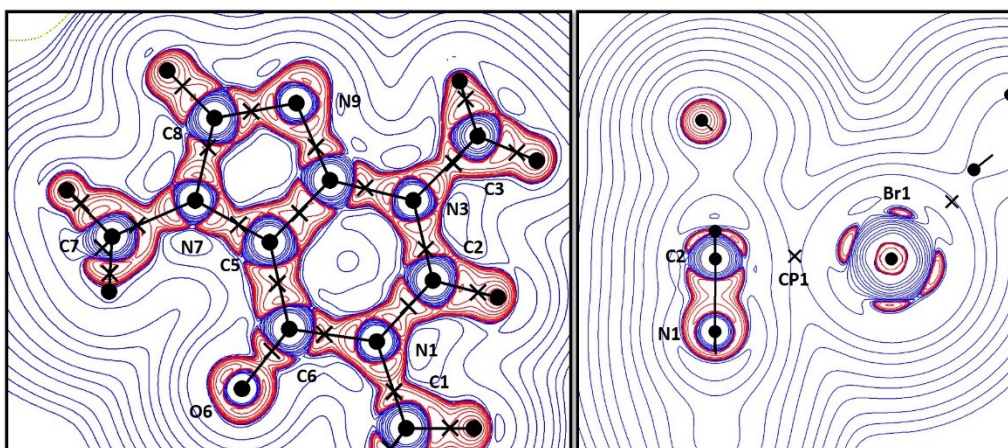

Figure SI-49. Laplacian maps of 2[Br]·H<sub>2</sub>O after multipolar refinement. Logarithmic scale. Intra- and intermolecular CP are depicted as cross in left and right figures, respectively.

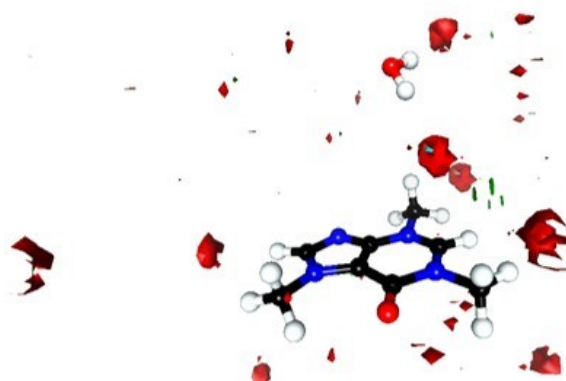

Figure SI-50. Residual density map, with isocontour  $\pm 0.24 \text{ e}/\text{\AA}^3$ . Positive and negative contours are plotted in green and red, respectively.



**Table SI-4.** Crystallographic refinement details of **2**[Br]·H<sub>2</sub>O from high resolution data.

|                                                                                                                   |                                                                             |                       |
|-------------------------------------------------------------------------------------------------------------------|-----------------------------------------------------------------------------|-----------------------|
| <b>Crystal data</b>                                                                                               | CCDC 2475642.                                                               |                       |
| Chemical Formula                                                                                                  | C <sub>8</sub> H <sub>11</sub> N <sub>4</sub> O, Br·0.804(H <sub>2</sub> O) |                       |
| <i>M<sub>r</sub></i>                                                                                              | 273.62                                                                      |                       |
| Crystal system, space group                                                                                       | Monoclinic, <i>P</i> 2 <sub>1</sub> / <i>c</i>                              |                       |
| Temperature (K)                                                                                                   | 100(1)                                                                      |                       |
| <i>a, b, c</i> (Å)                                                                                                | 11.4461(5), 15.0792(7), 6.4594(3)                                           |                       |
| β (°)                                                                                                             | 103.2320(10)                                                                |                       |
| <i>V</i> (Å <sup>3</sup> )                                                                                        | 1085.28(9)                                                                  |                       |
| <i>Z</i>                                                                                                          | 4                                                                           |                       |
| Radiation type                                                                                                    | Mo K (λ = 0.71073 Å)                                                        |                       |
| μ (mm <sup>-1</sup> )                                                                                             | 3.773                                                                       |                       |
| Crystal size (mm)                                                                                                 | 0.110 × 0.120 × 0.158                                                       |                       |
| <b>Data collection</b>                                                                                            |                                                                             |                       |
| Diffractometer                                                                                                    | Bruker D8 Venture with PHOTON III detector                                  |                       |
| Absorption correction                                                                                             | Multi-scan                                                                  |                       |
| <i>T<sub>min</sub></i> , <i>T<sub>max</sub></i>                                                                   | 0.6437 / 0.7503                                                             |                       |
| number of measured / independent reflections (mean redundancy)                                                    | 276116 / 12173 (22.7)                                                       |                       |
| <i>R<sub>int</sub></i>                                                                                            | 0.0437                                                                      |                       |
| (sinθ/λ) <sub>max</sub> (Å <sup>-1</sup> )                                                                        | 1.19 [ <i>d</i> = 0.42 Å]                                                   |                       |
| Completeness to (sinθ/λ) <sub>max</sub>                                                                           | 99.9 % (5 missing reflections)                                              |                       |
| <b>Refinement</b>                                                                                                 | <b>IAM</b>                                                                  | <b>Multipolar</b>     |
| Refinement based on                                                                                               | <i>F</i> <sup>2</sup>                                                       | <i>F</i> <sup>2</sup> |
| <i>R</i> [ <i>F</i> <sup>2</sup> > 2σ( <i>F</i> <sup>2</sup> )], <i>wR</i> ( <i>F</i> <sup>2</sup> ), <i>GooF</i> | 0.0219, 0.0622, 1.065                                                       | 0.0216, 0.0329, 1.02  |
| Number of parameters                                                                                              | 148                                                                         | 505                   |
| Δρ (e Å <sup>-3</sup> )                                                                                           | −1.22 / 1.07                                                                | −0.48 / 0.31          |

## Topological analysis of the covalent bonds

A quantitative analysis of the topological properties at bond critical points of covalent bonds in **2**[Br]·H<sub>2</sub>O is summarized in Table SI-3.

**Table SI-5.** Topological properties of (3,−1) CPs in covalent interactions of **2**[Br]·H<sub>2</sub>O:  $d_{12}$ : bond path length,  $d_{1CP}$  and  $d_{2CP}$ : distances from atom 1 and atom 2 (forming the bond) to CP (Å);  $\rho_{CP}$  electron density (e Å<sup>−3</sup>),  $\nabla^2\rho_{CP}$ , Laplacian (e Å<sup>−5</sup>),  $\lambda_i$  Hessian eigenvalues (e Å<sup>−5</sup>) and  $\epsilon$  ellipticity.

| Bond    | $d_{12}$ | $d_{1CP}$ | $d_{2CP}$ | $\rho_{CP}$ | $\nabla^2\rho_{CP}$ | $\lambda_1$ | $\lambda_2$ | $\lambda_3$ | $\epsilon$ |
|---------|----------|-----------|-----------|-------------|---------------------|-------------|-------------|-------------|------------|
| N1–C1   | 1.4692   | 0.8540    | 0.6155    | 1.669       | −8.13               | −11.25      | −10.58      | 13.69       | 0.06       |
| N1–C2   | 1.3314   | 0.7580    | 0.5730    | 2.496       | −25.90              | −22.50      | −18.28      | 14.87       | 0.23       |
| N1–C6   | 1.4188   | 0.8551    | 0.5653    | 1.828       | −16.35              | −15.20      | −11.99      | 10.84       | 0.27       |
| N3–C2   | 1.3212   | 0.8040    | 0.5186    | 2.445       | −27.93              | −22.30      | −16.84      | 11.24       | 0.32       |
| N3–C3   | 1.4689   | 0.8889    | 0.5815    | 1.570       | −10.34              | −10.52      | −9.61       | 9.78        | 0.09       |
| N3–C4   | 1.3749   | 0.7935    | 0.5810    | 2.063       | −19.52              | −18.27      | −14.36      | 13.11       | 0.27       |
| N7–C5   | 1.3724   | 0.8055    | 0.5668    | 2.055       | −14.60              | −15.34      | −12.93      | 13.66       | 0.18       |
| N7–C7   | 1.4610   | 0.9074    | 0.5528    | 1.570       | −11.32              | −10.32      | −7.97       | 6.97        | 0.29       |
| N7–C8   | 1.3550   | 0.8773    | 0.4787    | 2.093       | −15.65              | −15.96      | −12.24      | 12.54       | 0.30       |
| N9–C4   | 1.3498   | 0.7683    | 0.5830    | 2.244       | −18.78              | −18.47      | −15.30      | 14.98       | 0.21       |
| N9–C8   | 1.3361   | 0.7480    | 0.5882    | 2.367       | −18.88              | −18.26      | −16.44      | 15.82       | 0.11       |
| O6–C6   | 1.2210   | 0.7608    | 0.4610    | 2.910       | −37.91              | −28.89      | −24.86      | 15.84       | 0.16       |
| C1–H11  | 0.9780   | 0.7300    | 0.3603    | 1.817       | −16.80              | −17.35      | −16.65      | 17.21       | 0.04       |
| C1–H12  | 0.9815   | 0.7305    | 0.3587    | 1.841       | −17.13              | −17.47      | −17.05      | 17.39       | 0.02       |
| C1–H13  | 0.9816   | 0.7286    | 0.3611    | 1.836       | −16.46              | −17.02      | −16.95      | 17.51       | 0.04       |
| C2–H2   | 0.9501   | 0.7436    | 0.3350    | 1.831       | −18.94              | −18.75      | −17.71      | 17.52       | 0.06       |
| C3–H31  | 0.9805   | 0.7230    | 0.3718    | 1.740       | −14.15              | −16.15      | −15.25      | 17.24       | 0.06       |
| C3–H32  | 0.9814   | 0.7279    | 0.3629    | 1.746       | −15.39              | −16.64      | −15.42      | 16.68       | 0.08       |
| C3–H33  | 0.9792   | 0.7248    | 0.3678    | 1.711       | −14.70              | −16.09      | −15.04      | 16.43       | 0.07       |
| C4–C5   | 1.3833   | 0.7135    | 0.6711    | 2.146       | −18.26              | −16.16      | −13.72      | 11.62       | 0.18       |
| C5–C6   | 1.4273   | 0.6775    | 0.7510    | 2.084       | −16.80              | −16.35      | −13.16      | 12.70       | 0.24       |
| C7–H71  | 0.9869   | 0.7579    | 0.3413    | 1.805       | −15.96              | −17.77      | −16.76      | 18.57       | 0.06       |
| C7–H72  | 0.9747   | 0.7353    | 0.3575    | 1.781       | −17.56              | −17.07      | −16.98      | 16.50       | 0.05       |
| C7–H73  | 0.9772   | 0.7304    | 0.3614    | 1.714       | −15.80              | −16.21      | −15.29      | 15.70       | 0.06       |
| C8–H8   | 0.9506   | 0.7376    | 0.3438    | 1.864       | −18.25              | −18.67      | −17.61      | 18.05       | 0.06       |
| O1w–H1w | 0.9830   | 0.8199    | 0.1585    | 1.602       | −42.09              | −29.38      | −28.75      | 16.04       | 0.02       |
| O1w–H2w | 0.9830   | 0.8139    | 0.1662    | 1.639       | −39.26              | −29.24      | −28.10      | 18.07       | 0.04       |

## 9. References

- SI-1 H. Biltz and H. Rakett, *Ber. Dtsch. Chem. Ges.*, 1928, **61**, 1409–1422.
- SI-2 A. Makhloufi, W. Frank and C. Ganter, *Organometallics*, 2012, **31**, 7272–7277.
- SI-3 Bruker AXS Inc., SAINT, version 6.01, Bruker AXS Inc., Madison, WI, USA, 2001.
- SI-4 Bruker AXS Inc., SADABS, Area Detector Absorption Program, Bruker AXS Inc., Madison, WI, USA, 1996
- SI-5 L. Krause, R. Herbst-Irmer, G. M. Sheldrick and D. Stalke, *J. Appl. Crystallogr.*, 2015, **48**, 3–10.
- SI-6 G. M. Sheldrick, *Acta Crystallogr. Sect. A*, 2008, **64**, 112–122.
- SI-7 G. M. Sheldrick, *Acta Crystallogr. Sect. C*, 2015, **71**, 3–8.
- SI-8 L. J. Farrugia, *J. Appl. Cryst.*, 2012, **45**, 849–854.
- SI-9 O. V. Dolomanov, L. J. Bourhis, R. J. Gildea, J. A. K. Howard and H. Puschmann, *J. Appl. Cryst.*, 2009, **42**, 339–341.
- SI-10 S. Alvarez, *Dalton Trans.*, 2013, **42**, 8617–8636.
- SI-11 B. Cordero, V. Gómez, A. E. Platero-Prats, M. Revès, J. Echeverría, E. Cremades, F. Barragán and S. Alvarez, *Dalton Trans.*, 2008, 2832–2838.
- SI-12 D. M. Gil, J. Echeverría and S. Alvarez, *Inorg. Chem.*, 2022, **61**, 9082–9095.
- SI-13 P. R. Spackman, M. J. Turner, J. J. McKinnon, S. K. Wolff, D. J. Grimwood, D. Jayatilaka and M. A. Spackman, *J. Appl. Cryst.*, 2021, **54**, 1006–1011.
- SI-14 C. Jelsch, B. Guillot, A. Lagoutte and C. Lecomte, *J. Appl. Cryst.*, 2005, **38**, 38–54.
- SI-15 A. O. Madsen and A. A. Hoser, *J. Appl. Cryst.*, 2014, **47**, 2100–2104.
- SI-16 W.F. Kuhn, *Acta Cryst.*, 1992, **A48**, 80–98.
- SI-17 N. K. Hansen and P. Coppens, *Acta Cryst.*, 1978, **A34**, 909–921.
